# Supplementary material for: A Novel Hemocyte-Derived Peptide and Its Possible Roles in Immune Response of Ciona intestinalis Type A
Source: Preprints.org preprint supplement (doi:10.20944/preprints202312.1565.v1), 2023-12-20
Supplement: Supplementary file 1 [file supplementary]

## Sheet: TPM
Gene ID	0h	1h	2h	4h	8h
KY21.Chr1.1	0.07	0.03	0.05	0.05	0.06
KY21.Chr1.10	64.95	43.85	43.14	48.41	45.67
KY21.Chr1.100	6.05	4.25	2.81	2.53	2.37
KY21.Chr1.1000	47.25	21.91	20.73	19.07	13.21
KY21.Chr1.1001	3.49	2.98	2.35	2.58	2.32
KY21.Chr1.1002	0.32	0.26	0.25	0.22	0.17
KY21.Chr1.1003	0.06	0.15	0.11	0.12	0.12
KY21.Chr1.1004	8.63	8.15	6.78	9.01	9.66
KY21.Chr1.1005	3.1	2.37	2.29	1.95	1.82
KY21.Chr1.1006	40.71	30.28	19.36	21.9	15.74
KY21.Chr1.1007	0	0	0	0	0
KY21.Chr1.1008	0.7	1.08	0.91	0.6	0.31
KY21.Chr1.1009	2.17	1.94	1.66	1.31	1.15
KY21.Chr1.101	24.51	16.27	15.98	19.89	17.9
KY21.Chr1.1010	7.44	3.73	3.38	3.72	2.72
KY21.Chr1.1011	16.66	10.03	9.98	9.08	5.63
KY21.Chr1.1012	5.65	5.4	4.46	5.31	5.26
KY21.Chr1.1013	9.13	7.67	5.52	7.57	6.81
KY21.Chr1.1014	3.9	3.15	3.15	3.21	2.5
KY21.Chr1.1015	20.67	13.11	13.37	14.09	6.13
KY21.Chr1.1016	6.05	4.06	3.67	3.11	2.42
KY21.Chr1.1017	5.3	3.81	3.45	3.63	2.75
KY21.Chr1.1018	4.92	4.75	5.04	4.87	4.95
KY21.Chr1.1019	4.86	4.23	3.64	3.75	3.19
KY21.Chr1.102	8.08	4.62	4.79	4.66	4.02
KY21.Chr1.1020	9.54	5.92	4.8	6.54	4.02
KY21.Chr1.1021	1377.28	2018.85	1852.11	2147.87	1465.23
KY21.Chr1.1022	8.77	6.22	5.74	6.5	6.89
KY21.Chr1.1023	0	0	0	0	0
KY21.Chr1.1024	3.93	3.09	2.64	2.56	2.67
KY21.Chr1.1025	0.21	0.39	0.16	0.14	0.12
KY21.Chr1.1026	0	0	0	0	0
KY21.Chr1.1027	61.16	41.73	34.89	36.34	31.07
KY21.Chr1.1028	0.38	0.26	0.32	0.22	0.22
KY21.Chr1.1029	2.84	2.84	2.91	2.66	2.89
KY21.Chr1.103	0.13	0	0.03	0	0
KY21.Chr1.1030	0	0	0	0	0.09
KY21.Chr1.1031	12.58	9.74	8.87	10.27	7.79
KY21.Chr1.1032	0	0.16	0.28	0.14	0.21
KY21.Chr1.1033	47.9	32.65	30.25	44.53	43.87
KY21.Chr1.1034	0.09	0.21	0.19	0	0.1
KY21.Chr1.1035	13.36	11.77	8.22	11.36	10.18
KY21.Chr1.1036	0	0	0	0	0
KY21.Chr1.1037	65.72	42.18	30.05	41.23	24.44
KY21.Chr1.1038	0.61	0	0	0	0
KY21.Chr1.1039	0	0	0	0	0
KY21.Chr1.104	0	0.07	0.04	0.02	0.11
KY21.Chr1.1040	7.38	6.9	6.24	5.43	5.02
KY21.Chr1.1041	13.52	9.74	7.79	8.89	7.85
KY21.Chr1.1042	16.13	13.03	10.24	11.83	11.01
KY21.Chr1.1043	0.08	0	0.13	0.03	0
KY21.Chr1.1044	0	0	0	0	0
KY21.Chr1.1045	0.24	0	0	0	0
KY21.Chr1.1046	6.38	4.64	3.93	5.16	4.41
KY21.Chr1.1047	4	1.8	1.51	1.77	2.03
KY21.Chr1.1048	17.85	8.66	6.27	6.12	4.99
KY21.Chr1.1049	0.49	0.22	0.32	0.16	0.24
KY21.Chr1.105	0.56	0.28	0.32	0.23	0.31
KY21.Chr1.1050	11.53	5.62	6.74	5.29	4.11
KY21.Chr1.1051	8.14	7.15	6.29	6.48	6.72
KY21.Chr1.1052	15.89	9.87	10.65	5.61	5.62
KY21.Chr1.1053	0	0.09	0	0	0
KY21.Chr1.1054	0.13	0	0	0.17	0.07
KY21.Chr1.1055	1.95	1.59	1.39	1.45	1.01
KY21.Chr1.1056	2.63	1.45	1.42	1.72	0.94
KY21.Chr1.1057	1.66	1.76	1.65	2.01	2.32
KY21.Chr1.1058	4.53	4.25	3.36	3.95	3.04
KY21.Chr1.1059	8	5.36	5.34	4.65	3.97
KY21.Chr1.106	0.55	0.34	0.26	0.03	0.14
KY21.Chr1.1060	3.12	2.98	2.66	2.51	2.53
KY21.Chr1.1061	99.13	69.34	62.61	53.31	50.07
KY21.Chr1.1062	5.27	4.22	4.1	4.01	3.85
KY21.Chr1.1063	45.62	36.2	28	35.48	29.82
KY21.Chr1.1064	1.23	0.89	0.75	1	0.97
KY21.Chr1.1065	96.21	46.97	41.1	52.46	28.74
KY21.Chr1.1066	5.04	3.82	3.35	3.48	2.92
KY21.Chr1.1067	3.82	1.77	2.25	2.2	1.24
KY21.Chr1.1068	2.72	2.34	2.93	1.98	1.89
KY21.Chr1.1069	0.44	0	0	0.08	0.01
KY21.Chr1.107	6.25	4.57	4.36	4.87	4.43
KY21.Chr1.1070	0.34	0.3	0.1	0.03	0.28
KY21.Chr1.1071	86.25	64.28	67.69	90.13	62.6
KY21.Chr1.1072	1568.77	1052.01	1105.54	1135.55	752.89
KY21.Chr1.1073	16.51	11.68	11.93	17.01	13.24
KY21.Chr1.1074	10.93	7.23	6.81	6.25	8.66
KY21.Chr1.1075	0.07	0.1	0	0	0
KY21.Chr1.1076	0	0.1	0	0	0.02
KY21.Chr1.1077	4.54	3.52	3.07	3.96	2.88
KY21.Chr1.1078	0	0	0	0	0
KY21.Chr1.1079	0	0	0.13	0	0
KY21.Chr1.108	29.28	19.9	16.4	14.12	10.1
KY21.Chr1.1080	2.88	2.1	0.99	0.34	0.29
KY21.Chr1.1081	0	0.13	0	0	0
KY21.Chr1.1082	0	0	0	0	0
KY21.Chr1.1083	0.52	0.37	0.4	0.37	0.21
KY21.Chr1.1084	0.82	0.23	0.08	0.17	0.02
KY21.Chr1.1085	2.96	2.37	2.67	3.33	2.73
KY21.Chr1.1086	4.91	3.64	2.99	3.35	2.55
KY21.Chr1.1087	0	0	0	0	0
KY21.Chr1.1088	7.03	5.32	5.85	6.08	4.22
KY21.Chr1.1089	28.95	16.14	14.8	16.77	10.79
KY21.Chr1.109	114.33	68.5	53.95	41.6	32.06
KY21.Chr1.1090	3.27	2.53	2.06	1.95	1.42
KY21.Chr1.1091	4.27	3.25	2.33	1.84	1.96
KY21.Chr1.1092	0	0	0	0	0
KY21.Chr1.1093	5.25	4	5.68	8.06	10.18
KY21.Chr1.1094	4.12	3.7	3.36	3.77	3.23
KY21.Chr1.1095	8.22	6.47	5.36	7.05	5.59
KY21.Chr1.1096	24.15	20.63	15.55	17.32	15.58
KY21.Chr1.1097	4.27	3.15	3.9	5.73	3.91
KY21.Chr1.1098	0	0	0	0	0
KY21.Chr1.1099	18.63	17.41	16.22	23.91	13.17
KY21.Chr1.11	10.8	8.45	7.35	8.13	6.88
KY21.Chr1.110	44.8	21.93	23.59	28.27	14.57
KY21.Chr1.1100	0.07	0.06	0	0.05	0.19
KY21.Chr1.1101	15.54	16.24	14.1	12.01	8.78
KY21.Chr1.1102	0	0.09	0	0	0
KY21.Chr1.1103	1.79	1.4	1.38	1.42	1.18
KY21.Chr1.1104	3.03	1.96	1.62	1.76	1.42
KY21.Chr1.1105	0.1	0.04	0.07	0	0.08
KY21.Chr1.1106	0.38	0.43	0.36	0.32	0.36
KY21.Chr1.1107	0.52	0.58	0.3	0.72	0.25
KY21.Chr1.1108	0.08	0	0	0.1	0
KY21.Chr1.1109	10.75	8.12	7.69	9.09	8.64
KY21.Chr1.111	2.6	1.63	1.4	2.01	1.25
KY21.Chr1.1110	1.3	1.05	1	1.2	1.1
KY21.Chr1.1111	0.29	0.22	0.27	0.1	0.17
KY21.Chr1.1112	3.57	1.89	1.43	1.63	1.17
KY21.Chr1.1113	0.1	0.04	0.13	0.07	0
KY21.Chr1.1114	19.31	16.74	21.13	22.48	11.72
KY21.Chr1.1115	0.07	0.14	0.16	0.22	0.18
KY21.Chr1.1116	22.2	14.34	13.52	10.44	3.92
KY21.Chr1.1117	5.78	4.88	3.96	4.73	4.92
KY21.Chr1.1118	0.03	0	0	0.02	0.02
KY21.Chr1.1119	0.17	0.04	0.03	0.13	0.03
KY21.Chr1.112	0.93	0.59	0.63	0.47	0.25
KY21.Chr1.1120	0	0.02	0	0	0
KY21.Chr1.1121	9.45	7.87	5.14	4.38	3.53
KY21.Chr1.1122	2.02	1.73	0.93	0.74	1.27
KY21.Chr1.1123	1.9	1.12	1.17	0.83	0.84
KY21.Chr1.1124	6.4	4.89	3.51	4.33	3.47
KY21.Chr1.1125	0	0	0	0	0
KY21.Chr1.1126	0.84	0.55	0.57	1.45	1.35
KY21.Chr1.1127	1.74	1.27	0.84	2.7	2.42
KY21.Chr1.1128	38.85	27.46	17.09	16.78	19.25
KY21.Chr1.1129	0	0	0	0	0
KY21.Chr1.113	4.73	1.8	1.68	2.01	1.66
KY21.Chr1.1130	30.96	27.18	17.74	17.21	14.49
KY21.Chr1.1131	0.16	0.03	0.03	0	0
KY21.Chr1.1132	8.72	5.61	3.76	2.75	2.38
KY21.Chr1.1133	0.03	0.05	0	0	0
KY21.Chr1.1134	42.72	26.3	23.1	27.71	15.68
KY21.Chr1.1135	3.48	2.69	2.07	2.23	1.98
KY21.Chr1.1136	1.4	1.88	1.11	1.37	1.24
KY21.Chr1.1137	2.63	1.75	1.39	1.29	1.2
KY21.Chr1.1138	88.77	62.73	47.88	39.67	40.46
KY21.Chr1.1139	0.68	0.53	0.34	0.36	0.4
KY21.Chr1.114	0.44	0.7	0.31	0.54	0.42
KY21.Chr1.1140	17.22	9.7	9.97	12.08	7.15
KY21.Chr1.1141	5	2.85	3.62	3.73	3.01
KY21.Chr1.1142	14.04	9.54	8.51	8.07	6.28
KY21.Chr1.1143	3.42	2.75	2.5	1.8	1.72
KY21.Chr1.1144	3.53	3.04	3.23	2.87	2.68
KY21.Chr1.1145	0.43	0.11	0.25	0.05	0.19
KY21.Chr1.1146	2.98	2.22	1.83	1.51	1.53
KY21.Chr1.1147	16.81	8.74	9.69	8.71	5.77
KY21.Chr1.1148	4.16	3.63	2.74	2.64	1.94
KY21.Chr1.1149	2.47	1.44	1.45	0.84	0.25
KY21.Chr1.115	1.49	1.42	1.54	1.44	0.81
KY21.Chr1.1150	4.56	3.82	3.04	4.41	3.09
KY21.Chr1.1151	3.4	2.81	3.01	2.87	3
KY21.Chr1.1152	6.15	3.81	3.48	3.11	2.5
KY21.Chr1.1153	26.71	24.57	20.61	21.53	17.7
KY21.Chr1.1154	4.31	3.35	3.45	4.18	2.89
KY21.Chr1.1155	23	13.91	5.17	0	7.58
KY21.Chr1.1156	13.12	10.33	7.64	6.94	7.23
KY21.Chr1.1157	0.33	0.09	0.29	0.27	0.35
KY21.Chr1.1158	0.07	0.06	0.16	0.16	0.28
KY21.Chr1.1159	0.06	0	0	0	0
KY21.Chr1.116	6.02	4.76	3.21	3.8	2.95
KY21.Chr1.1160	6.38	6.07	5.92	5.25	4.41
KY21.Chr1.1161	1.8	2.5	1.93	1.72	1.69
KY21.Chr1.1162	4.07	3.28	2.96	3.02	3.35
KY21.Chr1.1163	6.87	5.72	5.72	5.27	5.9
KY21.Chr1.1164	4.13	2.61	3.73	7.27	3.71
KY21.Chr1.1165	5.29	2.93	1.47	2.04	1.67
KY21.Chr1.1166	8.16	5.27	5.5	7.02	5.01
KY21.Chr1.1167	7.44	5.63	3.57	4.65	2.05
KY21.Chr1.1168	2.02	1.27	1.56	1.51	0.82
KY21.Chr1.1169	3.05	2.63	1.99	2.15	1.37
KY21.Chr1.117	3.74	2.58	2.21	2.4	2.01
KY21.Chr1.1170	6.98	5.6	4.46	6.42	3.97
KY21.Chr1.1171	1.09	0.96	1.12	1.4	1.33
KY21.Chr1.1172	11.62	8.12	8.64	8.65	8.33
KY21.Chr1.1173	22.53	15.44	11.75	13.57	13.29
KY21.Chr1.1174	21.43	14.17	10.98	12.15	9.36
KY21.Chr1.1175	20.38	13.79	13.03	10.8	8.07
KY21.Chr1.1176	89.83	47.27	50.18	54.29	35.96
KY21.Chr1.1177	14.6	12.27	9.65	10.99	10.32
KY21.Chr1.1178	0	0	0	0	0
KY21.Chr1.1179	10.49	6.08	6.99	6.94	7.81
KY21.Chr1.118	8.37	5.28	4.38	3.63	3.6
KY21.Chr1.1180	2.35	1.95	2.19	1.93	1.8
KY21.Chr1.1181	32.16	19.69	17.31	17.65	11.55
KY21.Chr1.1182	20.28	14.84	12.18	15.67	18.54
KY21.Chr1.1183	1.82	0.74	1.3	0.99	2.52
KY21.Chr1.1184	0.89	0.1	0.67	0.95	1.11
KY21.Chr1.1185	0	0	0	0.05	0
KY21.Chr1.1186	0.84	0.62	1	1.44	1.86
KY21.Chr1.1187	6.76	5.38	4.22	4.57	4.66
KY21.Chr1.1188	0	0	0	0	0
KY21.Chr1.1189	3.93	2.66	1.8	1.9	1.37
KY21.Chr1.119	1.2	1.03	0.42	0.77	0.32
KY21.Chr1.1190	0.06	0.06	0.06	0.05	0.08
KY21.Chr1.1191	3.34	2.27	1.14	1.14	1.45
KY21.Chr1.1192	0.1	0.12	0.13	0.21	0.2
KY21.Chr1.1193	0	0.02	0.02	0.1	0.09
KY21.Chr1.1194	0	0.07	0	0	0.14
KY21.Chr1.1195	0	0.1	0	0	0
KY21.Chr1.1196	0	0	0	0	0
KY21.Chr1.1197	0	0	0	0	0
KY21.Chr1.1198	46.97	29.74	20.49	13.49	11.67
KY21.Chr1.1199	18.89	13.49	10.36	10.91	6.57
KY21.Chr1.12	9.83	7.38	6.92	8.57	6.75
KY21.Chr1.120	5.98	6.31	3.86	5.71	4.11
KY21.Chr1.1200	6.36	5.99	3.81	4.12	2.6
KY21.Chr1.1201	10.97	9.28	7.08	7.57	5.37
KY21.Chr1.1202	6.75	4.16	3.67	3.68	2.07
KY21.Chr1.1203	3.82	2.76	2.08	3.76	2.8
KY21.Chr1.1204	28.55	13.91	10.86	5.83	2.9
KY21.Chr1.1205	0	0	0	0	0
KY21.Chr1.1206	14.95	1.18	0.13	0.07	0.01
KY21.Chr1.1207	23.51	20.95	12.08	6.65	7.54
KY21.Chr1.1208	0.02	0.03	0.01	0.02	0.05
KY21.Chr1.1209	19.25	15.49	14.76	17.15	10.77
KY21.Chr1.121	5.72	8.52	5.61	10.96	7.07
KY21.Chr1.1210	0	0	0	0	0
KY21.Chr1.1211	74.43	49.54	62.74	64.33	35.21
KY21.Chr1.1212	8.73	6.96	6.27	5.83	5.34
KY21.Chr1.1213	130.65	69.49	67.32	54.14	51.27
KY21.Chr1.1214	2.16	1.64	1.71	0.97	1.49
KY21.Chr1.1215	366.3	228.45	225.04	164.86	149.26
KY21.Chr1.1216	0	0	0	0	0
KY21.Chr1.1217	38.16	55.6	54.73	59.03	42.33
KY21.Chr1.1218	735.48	933.8	968.66	1119.79	756.62
KY21.Chr1.1219	130.25	188.21	187.21	212.87	149.97
KY21.Chr1.122	0	0	0	0.13	0
KY21.Chr1.1220	372.16	485.99	513.59	640.64	436.11
KY21.Chr1.1221	0.03	0	0	0	0
KY21.Chr1.1222	0.12	0.24	0.23	0.15	0.1
KY21.Chr1.1223	82.03	159.51	129.74	182.75	81.64
KY21.Chr1.1224	103.6	161.33	117.28	60.01	64.77
KY21.Chr1.1225	0	0	0	0	0
KY21.Chr1.1226	49.53	37.11	33.55	44.19	37.55
KY21.Chr1.1227	0.01	0.01	0.02	0	0
KY21.Chr1.1228	33.38	23.35	16.88	21.95	13.27
KY21.Chr1.1229	6.79	4.23	5.35	6.9	6.23
KY21.Chr1.123	0.31	0.16	0.14	0.29	0
KY21.Chr1.1230	0.67	0.56	0.66	0.66	0.25
KY21.Chr1.1231	2.92	2.32	2.52	2.02	2.04
KY21.Chr1.1232	6.17	5.57	3.93	4.28	3.95
KY21.Chr1.1233	3.9	3.17	3.21	2.64	2.58
KY21.Chr1.1234	4.17	3.62	3.63	3.43	2.77
KY21.Chr1.1235	2.1	0.87	0.79	0.69	0.4
KY21.Chr1.1236	5.12	4.25	3.34	4.14	2.3
KY21.Chr1.1237	13.33	9.25	5.63	7.99	6.22
KY21.Chr1.1238	0.34	0.35	0.21	0.31	0.22
KY21.Chr1.1239	5.3	3.42	3.05	3.22	2.48
KY21.Chr1.124	2.72	2.7	2.11	2.53	2.93
KY21.Chr1.1240	0	0	0	0	0
KY21.Chr1.1241	4.95	4.28	3.48	3.85	4.07
KY21.Chr1.1242	2.93	2.31	2.11	1.76	1.7
KY21.Chr1.1243	193.56	141.37	126.2	95.91	50.47
KY21.Chr1.1244	0.54	0.18	0.06	0.23	0.16
KY21.Chr1.1245	6.07	3.81	1.82	1.3	2.32
KY21.Chr1.1246	0	0.13	0	0.11	0
KY21.Chr1.1247	0	0	0	0	0
KY21.Chr1.1248	3.71	1.94	2.56	3.3	0.97
KY21.Chr1.1249	0.88	0.78	0.64	0.8	0.46
KY21.Chr1.125	3.47	2.22	1.55	0.83	0.95
KY21.Chr1.1250	10.72	7.64	5.8	4.42	4.92
KY21.Chr1.1251	11.05	7.81	6.16	6.65	10.19
KY21.Chr1.1252	0.54	0.07	0.06	0.88	0.05
KY21.Chr1.1253	0.16	0.13	0	0	0
KY21.Chr1.1254	0	0	0	0	0.11
KY21.Chr1.1255	0.07	0	0.09	0	0.14
KY21.Chr1.1256	0	0	0	0	0
KY21.Chr1.1257	4.02	2.66	1.48	0.92	1.34
KY21.Chr1.1258	0.87	0.39	0.14	0.2	0.09
KY21.Chr1.1259	0.95	0.39	0.68	0.11	0.17
KY21.Chr1.126	19.13	11.48	5.56	2.5	1.6
KY21.Chr1.1260	0	0	0	0	0
KY21.Chr1.1261	0	0	0	0	0
KY21.Chr1.1262	84.68	49.37	42.65	45.5	36.57
KY21.Chr1.1263	3.7	3.27	2.81	1.81	1.33
KY21.Chr1.1264	644.72	585.17	599.1	792.28	581.82
KY21.Chr1.1265	2.15	1.36	1.24	0.79	1.84
KY21.Chr1.1266	8.34	3.49	2.7	2.96	3.43
KY21.Chr1.1267	12.64	8.75	8.63	13.95	15.42
KY21.Chr1.1268	11.45	6.21	7.38	11.54	11.37
KY21.Chr1.1269	0.22	0.14	0.12	0.1	0.17
KY21.Chr1.127	0	0	0	0	0
KY21.Chr1.1270	0.07	0.04	0.07	0.13	0.03
KY21.Chr1.1271	181	130.55	155.9	157.4	156.76
KY21.Chr1.1272	0	0	0	0.82	0.21
KY21.Chr1.1273	1.01	0.7	0.67	0.8	0.46
KY21.Chr1.1274	0.32	0.15	0.58	0.13	0.38
KY21.Chr1.1275	5.38	3.95	3.01	3.37	3.07
KY21.Chr1.1276	10.41	8.12	6.59	6.22	5.93
KY21.Chr1.1277	0	0	0	0	0
KY21.Chr1.1278	0	0	0.01	0	0
KY21.Chr1.1279	0.58	0.14	0.34	0.48	0.23
KY21.Chr1.128	0	0.01	0	0	0
KY21.Chr1.1280	0	0.15	0	0.06	0.1
KY21.Chr1.1281	0.68	0.35	0.59	0.62	0.67
KY21.Chr1.1282	0.4	0.16	0.22	0.3	0.25
KY21.Chr1.1283	3.13	1.68	1.54	1.2	0.91
KY21.Chr1.1284	0.03	0	0	0	0
KY21.Chr1.1285	0.77	0.45	0.34	0.42	0.19
KY21.Chr1.1286	48.47	33.45	29.43	35.11	25.75
KY21.Chr1.1287	3.94	3.51	3.33	3.98	3.83
KY21.Chr1.1288	5.63	4.48	3.96	3.89	3.58
KY21.Chr1.1289	6.13	3.89	3.96	3.7	3.44
KY21.Chr1.129	10.4	7.62	5.62	5.81	4.56
KY21.Chr1.1290	3.94	2.57	2.74	2.64	2.48
KY21.Chr1.1291	8.7	5.94	6.58	7.9	8.24
KY21.Chr1.1292	4.06	2.22	2.43	2.34	1.87
KY21.Chr1.1293	2.06	1.72	1.3	1.34	1.16
KY21.Chr1.1294	0	0	0	0	0
KY21.Chr1.1295	33.17	16.26	15.55	20.64	10.08
KY21.Chr1.1296	4.94	3.35	3.14	3.59	3.12
KY21.Chr1.1297	4.93	4.35	3.95	5.18	6.49
KY21.Chr1.1298	24.41	16.69	15.83	9.4	8.81
KY21.Chr1.1299	0.73	0	0.59	0	0
KY21.Chr1.13	0	0	0	0	0
KY21.Chr1.130	12.5	10.32	10.39	9.65	6.69
KY21.Chr1.1300	7.94	5.8	5.87	7.32	6.09
KY21.Chr1.1301	11.46	8.72	7.63	8.33	6.68
KY21.Chr1.1302	34.51	20.57	19.22	23.42	15.76
KY21.Chr1.1303	45.65	36.38	32.62	46.34	32.91
KY21.Chr1.1304	0.8	0.62	0.88	1.38	0.86
KY21.Chr1.1305	1.11	0	0.33	0.33	0
KY21.Chr1.1306	1.84	1.85	1.29	1.34	1.13
KY21.Chr1.1307	5.11	3.58	3.76	3.07	2.08
KY21.Chr1.1308	16.22	9.64	9.06	10.01	6.32
KY21.Chr1.1309	15.61	9.96	9.47	11.8	7.24
KY21.Chr1.131	0	0	0	0	0.02
KY21.Chr1.1310	26.37	10.81	10.47	12.89	8.17
KY21.Chr1.1311	0.1	0	0.09	0.07	0.07
KY21.Chr1.1312	31.26	21.43	20.52	25.56	17.72
KY21.Chr1.1313	1.84	1.5	1.18	0.88	1.14
KY21.Chr1.1314	1.89	1.59	1.34	1.24	1.04
KY21.Chr1.1315	0.16	0	0	0	0.04
KY21.Chr1.1316	11.63	5.63	6.63	8.85	5.3
KY21.Chr1.1317	9	3.68	2.52	1.52	0
KY21.Chr1.1318	0	0	0	0	0
KY21.Chr1.1319	2.32	2.3	2.53	2.43	1.08
KY21.Chr1.132	13.91	6.51	4.2	3.7	4.86
KY21.Chr1.1320	106.91	86.27	73.42	84.4	39.02
KY21.Chr1.1321	3.78	4.58	3.76	2.33	2.29
KY21.Chr1.1322	4.12	3.33	2.19	3.64	1.48
KY21.Chr1.1323	2.41	3.8	3.87	2.58	1.24
KY21.Chr1.1324	0	0	0	0	0
KY21.Chr1.1325	0	0	0	0	0
KY21.Chr1.1326	0.07	0.05	0.12	0.02	0.02
KY21.Chr1.1327	0	3.79	1.12	1.13	0.84
KY21.Chr1.1328	1.64	0	0	0	0
KY21.Chr1.1329	6.54	3.77	3.47	4.94	2.31
KY21.Chr1.133	9.34	6.53	4.4	3.91	4.72
KY21.Chr1.1330	7.39	5.74	5.09	4.97	4.25
KY21.Chr1.1331	0	0	0	0	0
KY21.Chr1.1332	3.79	3.38	3.03	3.39	3.1
KY21.Chr1.1333	17.66	10.01	8.1	9.05	7.78
KY21.Chr1.1334	1.62	1.1	1.06	0.65	0.81
KY21.Chr1.1335	0.04	0.02	0.02	0.03	0.01
KY21.Chr1.1336	26.56	22.05	18.54	22.1	17.32
KY21.Chr1.1337	0.04	0	0	0	0
KY21.Chr1.1338	26.83	20.84	19.65	21.04	18.72
KY21.Chr1.1339	0.08	0	0	0	0.01
KY21.Chr1.134	0	0	0	0	0
KY21.Chr1.1340	0	0	0	0	0
KY21.Chr1.1341	2.98	2.98	1.74	1.91	1.55
KY21.Chr1.1342	188.65	133.06	78.58	58.15	33.22
KY21.Chr1.1343	0	0.04	0	0	0
KY21.Chr1.1344	0.38	0.13	0.37	0.25	0.15
KY21.Chr1.1345	30.96	17.94	15.82	17.46	11.95
KY21.Chr1.1346	0.11	0.17	0.13	0.12	0.06
KY21.Chr1.1347	12.73	9.97	8.46	11.45	10.43
KY21.Chr1.1348	0.02	0	0.05	0	0
KY21.Chr1.1349	13.27	12.52	10.19	11.34	11.74
KY21.Chr1.135	0	0	0	0	0
KY21.Chr1.1350	187.45	147.62	135.62	130.85	90.54
KY21.Chr1.1351	5.36	3.76	3.32	3.65	2.7
KY21.Chr1.1352	0.67	0.37	0.4	0.4	0.27
KY21.Chr1.1353	0	0	0	0	0
KY21.Chr1.1354	0	0	0	0	0
KY21.Chr1.1355	0	0	0	0	0
KY21.Chr1.1356	0	0	0	0	0
KY21.Chr1.1357	0	0	0	0	0
KY21.Chr1.1358	5.76	2.95	3.25	3.5	2.74
KY21.Chr1.1359	2.02	2.26	2.13	2.3	2.8
KY21.Chr1.136	12.12	8.05	6.23	6.02	4.86
KY21.Chr1.1360	6.82	4.93	3.62	3.01	2.73
KY21.Chr1.1361	1.62	1.52	1.14	0.95	0.96
KY21.Chr1.1362	1243.55	829.92	820.11	852.86	573.04
KY21.Chr1.1363	17.89	11.62	12.06	11.12	8.51
KY21.Chr1.1364	7.69	4.76	7.99	9.55	11.98
KY21.Chr1.1365	9.77	6.31	7.11	7.1	4.69
KY21.Chr1.1366	0	0	0	0.29	0.65
KY21.Chr1.1367	16.6	13.82	14.28	20.98	14.44
KY21.Chr1.1368	0.06	0.04	0.01	0.04	0.02
KY21.Chr1.1369	2.26	2.18	2.8	3.44	2.73
KY21.Chr1.137	10.29	8.59	8.74	12.6	9.28
KY21.Chr1.1370	0.19	0.03	0.11	0.05	0.08
KY21.Chr1.1371	1.2	0.63	0.66	1.04	0.65
KY21.Chr1.1372	0.48	0.27	0.3	0.4	0.34
KY21.Chr1.1373	0.49	0.19	0.41	0.54	0.21
KY21.Chr1.1374	0.06	0.02	0.13	0.05	0.03
KY21.Chr1.1375	93.02	67.05	67.11	61.58	42.41
KY21.Chr1.1376	7.38	3.23	4.1	5.67	2.62
KY21.Chr1.1377	0.11	0.07	0.06	0.09	0.12
KY21.Chr1.1378	8.06	3.98	3.82	3.46	4.75
KY21.Chr1.1379	9.76	5.64	3.16	0.68	0.63
KY21.Chr1.138	67.57	41.14	26.32	16.28	7.97
KY21.Chr1.1380	0	0	0	0	0
KY21.Chr1.1381	64.58	38.43	36.9	37.88	26.19
KY21.Chr1.1382	0.27	0	0	0	0
KY21.Chr1.1383	0	0	0	0	0
KY21.Chr1.1384	7.71	5.7	4.54	5.12	5.62
KY21.Chr1.1385	9.14	6.47	5.07	4.96	6.06
KY21.Chr1.1386	15.34	7.81	6.19	7.21	4.74
KY21.Chr1.1387	9.98	6.99	6.05	5.22	6.06
KY21.Chr1.1388	19.58	11.5	12.01	13.25	9.53
KY21.Chr1.1389	0.69	0.31	0.2	0.2	0.4
KY21.Chr1.139	0	0	0	0	0
KY21.Chr1.1390	0.34	0.36	0.43	0.22	0.19
KY21.Chr1.1391	0.96	1.47	1.04	1.38	0.84
KY21.Chr1.1392	70.9	77.54	62.49	85.3	60.56
KY21.Chr1.1393	0.1	0.04	0.04	0.05	0
KY21.Chr1.1394	0.47	0	0.29	0.07	0.03
KY21.Chr1.1395	25.35	16.44	14.69	18.74	15.75
KY21.Chr1.1396	0.68	0.48	0.66	1.07	0.43
KY21.Chr1.1397	8.94	6.49	4.12	4.03	4.01
KY21.Chr1.1398	8.56	4.16	0	0	0.92
KY21.Chr1.1399	2.2	1.35	1.72	1.68	1.55
KY21.Chr1.14	0.33	1.52	0.49	1.02	1.3
KY21.Chr1.140	8.94	3.73	3.23	5.32	3.77
KY21.Chr1.1400	10.19	7	4.89	4.68	6.36
KY21.Chr1.1401	7.37	6.57	5.97	6.58	7.09
KY21.Chr1.1402	1.81	1.12	1.12	1.08	1.71
KY21.Chr1.1403	0.07	0.03	0.01	0.02	0.04
KY21.Chr1.1404	0	0.01	0	0.02	0
KY21.Chr1.1405	0.3	0.31	0.34	0.7	0.51
KY21.Chr1.1406	13.97	9.19	9.47	16.82	22.65
KY21.Chr1.1407	11.25	4.81	4.84	7.39	7.21
KY21.Chr1.1408	10.55	8.69	6.77	7.48	7.84
KY21.Chr1.1409	16.41	13.86	12.42	12.63	11.68
KY21.Chr1.141	1.07	0.98	0.88	1	0.86
KY21.Chr1.1410	11.32	7.43	8.36	10.32	7.21
KY21.Chr1.1411	11.71	9.01	9.18	9.95	10.75
KY21.Chr1.1412	13.1	9.01	6.27	5.77	3.57
KY21.Chr1.1413	0	0	0.29	0	0.22
KY21.Chr1.1414	26.3	16.96	18.82	18.43	9.71
KY21.Chr1.1415	1.47	1.42	1.26	2.37	2.26
KY21.Chr1.1416	1.89	1.65	1.6	2.54	1.69
KY21.Chr1.1417	14.75	11.54	13.73	12.6	8.41
KY21.Chr1.1418	0.58	0.3	0.24	0.26	0.25
KY21.Chr1.1419	0	0	0	0	0
KY21.Chr1.142	7.52	6.45	5.38	5.88	6.41
KY21.Chr1.1420	0	0	0	0	0
KY21.Chr1.1421	2.26	2.28	1.76	1.98	1.75
KY21.Chr1.1422	2.77	1.71	1.8	1.62	1.31
KY21.Chr1.1423	1.96	1.31	1.11	1.34	1.15
KY21.Chr1.1424	0.04	0	0	0	0.01
KY21.Chr1.1425	0.02	0.01	0.01	0.01	0.02
KY21.Chr1.1426	0	0	0	0	0
KY21.Chr1.1427	7.44	5.52	5.14	4.93	4.89
KY21.Chr1.1428	2.18	1.6	0.91	0.68	1.39
KY21.Chr1.1429	18.49	13.74	11.84	15	15.44
KY21.Chr1.143	1.41	1.11	1.14	1.36	1.51
KY21.Chr1.1430	7.75	4.22	4.67	4.87	4.03
KY21.Chr1.1431	55.64	30.3	24.98	36.99	58.96
KY21.Chr1.1432	3.13	3.04	2.62	2.77	2.84
KY21.Chr1.1433	3.76	2.76	1.81	2.61	1.97
KY21.Chr1.1434	0.7	0.81	0.69	0.39	0.28
KY21.Chr1.1435	0.94	0.77	0.34	0.53	0.42
KY21.Chr1.1436	11.76	9.43	6.59	9.23	13.74
KY21.Chr1.1437	48.04	34.57	31.12	29.69	16.67
KY21.Chr1.1438	2.82	2.02	1.6	1.46	0.64
KY21.Chr1.1439	3.39	1.65	1.29	0.64	0.7
KY21.Chr1.144	0.1	0	0.07	0	0
KY21.Chr1.1440	5.81	3.25	2.52	1.7	1.42
KY21.Chr1.1441	0.35	0.27	0.42	0.21	0.37
KY21.Chr1.1442	0.46	0.26	0.13	0.25	0.14
KY21.Chr1.1443	0	0	0	0	0
KY21.Chr1.1444	14.84	9.51	4.39	1.19	0.75
KY21.Chr1.1445	0.19	0.11	0.42	0.11	0.13
KY21.Chr1.1446	27.06	19.32	15.26	14.57	7.05
KY21.Chr1.1447	0	0.06	0	0	0
KY21.Chr1.1448	0	0	0	0	0
KY21.Chr1.1449	0.04	0.06	0	0	0
KY21.Chr1.145	0.07	0.04	0.04	0.04	0.02
KY21.Chr1.1450	2.16	2.23	1.79	2.49	2.02
KY21.Chr1.1451	1.92	1.51	1.46	1.83	1.56
KY21.Chr1.1452	0.32	0.16	0.23	0.16	0.11
KY21.Chr1.1453	10.69	6.87	6.62	5.71	4.79
KY21.Chr1.1454	8.42	8.12	7.25	7.99	7.52
KY21.Chr1.1455	9.13	5.84	5.12	6.39	5.01
KY21.Chr1.1456	4.88	3.31	3.57	3.59	3.01
KY21.Chr1.1457	6.58	4.76	4.59	4.11	3.74
KY21.Chr1.1458	0	0	0	0	0.01
KY21.Chr1.1459	0.68	0.45	0.29	0.18	0.18
KY21.Chr1.146	0.03	0	0.02	0.03	0.01
KY21.Chr1.1460	9.51	5.71	8.2	10.62	6.96
KY21.Chr1.1461	0.11	0	0	0.03	0
KY21.Chr1.1462	86.8	61.53	49.7	42.14	40.54
KY21.Chr1.1463	0.79	0.52	0.48	0.99	0.61
KY21.Chr1.1464	72.57	47.17	36.16	30.96	27.57
KY21.Chr1.1465	9.57	6.91	5.59	3.61	3.17
KY21.Chr1.1466	0	0	0	0	0
KY21.Chr1.1467	0.26	0.1	0.18	0.18	0.16
KY21.Chr1.1468	2.13	1.33	0.84	1.19	1.57
KY21.Chr1.1469	4.47	4.23	2.56	2.79	4.49
KY21.Chr1.147	0.53	0.08	0.07	0	0.18
KY21.Chr1.1470	21.5	15.87	14.63	21.95	20.59
KY21.Chr1.1471	3.16	2.21	2.44	2.79	1.88
KY21.Chr1.1472	2.26	1.35	1.7	1.49	0.98
KY21.Chr1.1473	3.99	2.52	2.39	1.35	1.44
KY21.Chr1.1474	10.75	7.4	7.45	6.59	3.1
KY21.Chr1.1475	14.86	10.91	9.56	9.83	7.02
KY21.Chr1.1476	11.35	8.65	6.84	6.91	5.61
KY21.Chr1.1477	5.5	3.6	2.97	3.36	1.94
KY21.Chr1.1478	19.98	15.92	13.33	14.26	10.13
KY21.Chr1.1479	25.9	13.31	12.66	14.78	9.91
KY21.Chr1.148	21.57	16.11	13.23	8.3	7.32
KY21.Chr1.1480	0.26	0.23	0.23	0.21	0.16
KY21.Chr1.1481	1.19	0.73	0.68	0.73	0.34
KY21.Chr1.1482	0.83	0	0	0	0
KY21.Chr1.1483	0.14	0	0	0	0
KY21.Chr1.1484	164.45	121.65	126.53	143.71	90.6
KY21.Chr1.1485	7.86	6.39	5.92	6.54	5.91
KY21.Chr1.1486	4.79	3.7	2.92	3.33	3.37
KY21.Chr1.1487	0.06	0.02	0	0	0
KY21.Chr1.1488	2.11	1.85	0.87	0.38	0.23
KY21.Chr1.1489	0.51	0.38	0.41	0.4	0.53
KY21.Chr1.149	20.05	11.94	10.15	10.74	8.32
KY21.Chr1.1490	0	0	0	0	0
KY21.Chr1.1491	0	0	0	0	0
KY21.Chr1.1492	18.76	13.82	13.16	13.18	12.71
KY21.Chr1.1493	0	0	0	0	0
KY21.Chr1.1494	0	0	0	0	0
KY21.Chr1.1495	0.03	0.04	0.04	0	0.05
KY21.Chr1.1496	0	0	0	0	0
KY21.Chr1.1497	2.66	2.2	1.47	1.69	1.49
KY21.Chr1.1498	47.48	33.59	28.67	33.98	19.59
KY21.Chr1.1499	0.28	0.18	0.11	0.21	0.12
KY21.Chr1.15	4.5	2.65	2.71	2.73	3.34
KY21.Chr1.150	2.92	1.72	1.04	1.27	1.1
KY21.Chr1.1500	7.32	8.37	5.67	5.02	4.44
KY21.Chr1.1501	12.69	14.74	10.06	10.85	9.45
KY21.Chr1.1502	5.46	6.38	4.33	5.93	4.57
KY21.Chr1.1503	9.36	6.94	5.07	6.09	6.01
KY21.Chr1.1504	39.25	24.99	20.7	20.91	16.72
KY21.Chr1.1505	348.93	235.98	257.87	219.72	134.38
KY21.Chr1.1506	243.47	172.66	169.24	151.71	105.69
KY21.Chr1.1507	6.3	4.38	2.74	2.6	2.63
KY21.Chr1.1508	57.97	41.31	38.08	34.41	17.2
KY21.Chr1.1509	14.59	6.56	3.07	4.05	0.94
KY21.Chr1.151	0.89	0.02	0	0	0
KY21.Chr1.1510	9.03	5.99	5.75	5.35	4.86
KY21.Chr1.1511	0	0.34	0	0	0
KY21.Chr1.1512	6.18	4.08	3.23	3.14	3.03
KY21.Chr1.1513	13.32	6.48	5.57	6.03	4.58
KY21.Chr1.1514	10.6	8.06	6.25	5.85	5.2
KY21.Chr1.1515	0.08	0.07	0.02	0	0.01
KY21.Chr1.1516	3.93	2.33	1.98	1.53	0.82
KY21.Chr1.1517	10.45	4.72	2.83	2.1	1.96
KY21.Chr1.1518	3.13	2.71	2.87	3.18	2.01
KY21.Chr1.1519	8.17	6.37	5.16	5.7	5.13
KY21.Chr1.152	0.5	0.05	0	0	0
KY21.Chr1.1520	5.78	4.64	3.65	3.02	2.28
KY21.Chr1.1521	28.79	24.16	19.71	32.63	18.94
KY21.Chr1.1522	0	0.02	0.02	0.02	0.01
KY21.Chr1.1523	7.64	6.11	4.51	5.41	4.87
KY21.Chr1.1524	1.55	0.27	0.7	0.23	0.71
KY21.Chr1.1525	10	5.54	5.46	5.93	5.26
KY21.Chr1.1526	5.09	3.5	3.26	3.53	2.57
KY21.Chr1.1527	16.56	8.91	8.8	10.55	8.34
KY21.Chr1.1528	2.28	1.34	1.5	1.06	0.61
KY21.Chr1.1529	9.11	8.04	9.72	6.02	5.07
KY21.Chr1.153	0.14	0	0	0	0
KY21.Chr1.1530	12	8.54	8.14	6.65	6.17
KY21.Chr1.1531	18.37	15.21	14.63	13.99	11.55
KY21.Chr1.1532	24.03	18.02	17.54	15.88	7.76
KY21.Chr1.1533	9.37	6.45	5.28	5.99	5.41
KY21.Chr1.1534	4.01	0.11	0	0	0
KY21.Chr1.1535	101.77	58.65	43.67	39.54	37.88
KY21.Chr1.1536	0.64	0.27	0.15	0.09	0.2
KY21.Chr1.1537	4.36	2.21	0.71	1.1	1.2
KY21.Chr1.1538	0	0	0	0	0
KY21.Chr1.1539	0	0	0	0	0
KY21.Chr1.154	0	0	0	0	0.03
KY21.Chr1.1540	0	0	0	0	0
KY21.Chr1.1541	4.78	4.46	3.9	4.78	4.51
KY21.Chr1.1542	16.62	11.8	9.78	10.44	9.51
KY21.Chr1.1543	5.86	3.7	3.73	2.88	1.75
KY21.Chr1.1544	8.09	6.17	4.67	3.69	3.47
KY21.Chr1.1545	6.23	4.19	4.16	4.7	4.4
KY21.Chr1.1546	938.31	1485.41	1414.89	1722.44	1218
KY21.Chr1.1547	12.5	16.79	14.93	10.89	4.04
KY21.Chr1.1548	0.27	0.41	0.29	0.38	0.28
KY21.Chr1.1549	36.82	28.8	24.37	26.1	22.45
KY21.Chr1.155	6.95	4.76	4.43	3.79	4.53
KY21.Chr1.1550	112.58	76.26	73.76	68.77	48.34
KY21.Chr1.1551	2.63	1.62	1.88	1.67	1.28
KY21.Chr1.1552	4.8	3.78	3.41	3.16	3.15
KY21.Chr1.1553	72.38	64.35	64.68	64.28	42.35
KY21.Chr1.1554	5.85	3.58	3.58	3.28	3.31
KY21.Chr1.1555	4.14	1.88	2.67	2.3	2.06
KY21.Chr1.1556	2.48	1.45	0.84	1.37	1.18
KY21.Chr1.1557	1.75	0.66	0.85	1.21	1.02
KY21.Chr1.1558	0.04	0.01	0.15	0.08	0.09
KY21.Chr1.1559	0.45	0.32	0.29	0.41	0.23
KY21.Chr1.156	1.02	0.59	0.72	1.15	1.32
KY21.Chr1.1560	0.12	0.08	0.05	0.08	0.08
KY21.Chr1.1561	12.99	9.03	7.84	7.26	5.58
KY21.Chr1.1562	1821.3	1387.3	1452.91	1458.94	996.05
KY21.Chr1.1563	14.42	11.05	10.02	9.54	8.91
KY21.Chr1.1564	2.72	2.41	2.63	2.27	1.86
KY21.Chr1.1565	0.23	0.12	0.13	0.15	0.12
KY21.Chr1.1566	4	2.13	1.18	1.38	2.05
KY21.Chr1.1567	0.1	0.06	0.04	0.06	0.02
KY21.Chr1.1568	0.01	0	0.02	0.02	0.01
KY21.Chr1.1569	0.02	0	0	0	0.04
KY21.Chr1.157	59.95	41.11	45.9	73.83	138.33
KY21.Chr1.1570	0	0.02	0	0	0.01
KY21.Chr1.1571	0	0	0	0	0
KY21.Chr1.1572	21.54	17.94	11.64	12.49	9.43
KY21.Chr1.1573	38.75	23.5	19.91	22.1	10.34
KY21.Chr1.1574	0	0	0	0	0
KY21.Chr1.1575	0	0	0	0	0
KY21.Chr1.1576	23.44	18.55	18.21	22.59	15.55
KY21.Chr1.1577	39.28	29.05	29.25	24.64	23.54
KY21.Chr1.1578	0	0	0	0	0
KY21.Chr1.1579	0	0	0	0	0
KY21.Chr1.158	4.07	3.34	2.78	3.55	2.35
KY21.Chr1.1580	0	0	0	0	0
KY21.Chr1.1581	1.1	0.72	0.64	0.32	0.51
KY21.Chr1.1582	12.13	7.75	4.76	3.69	5.77
KY21.Chr1.1583	24.46	20.41	17.09	18.86	18.06
KY21.Chr1.1584	2.72	2.48	1.96	2.38	2.33
KY21.Chr1.1585	72.33	56.33	50.86	46.01	37.98
KY21.Chr1.1586	1.23	0.73	0.84	0.65	0.57
KY21.Chr1.1587	0.04	0.07	0.04	0.05	0.01
KY21.Chr1.1588	0	0	0	0	0
KY21.Chr1.1589	0.69	0.43	0.25	0.69	0.64
KY21.Chr1.159	63.31	52.92	63.15	47.96	24.65
KY21.Chr1.1590	0.94	0.58	0.78	0.61	0.21
KY21.Chr1.1591	4.52	3.59	4.93	4.25	2.29
KY21.Chr1.1592	0.22	0.12	0.15	0.03	0.05
KY21.Chr1.1593	48.77	32.07	24.34	23.92	16.52
KY21.Chr1.1594	1.52	0.26	0.03	0.06	0.06
KY21.Chr1.1595	1.6	0.27	0.21	0.18	0.17
KY21.Chr1.1596	2.68	1.41	1.75	1.34	1.45
KY21.Chr1.1597	2.99	2.01	1.78	1.79	1.35
KY21.Chr1.1598	14.61	10.3	9.79	13.12	12.03
KY21.Chr1.1599	2.49	1.67	1.14	1.01	1.55
KY21.Chr1.16	1.36	1.39	1.14	1.15	0.93
KY21.Chr1.160	0.04	0	0.02	0	0
KY21.Chr1.1600	47.03	24.26	24.28	26.04	17.89
KY21.Chr1.1601	0.03	0	0	0	0
KY21.Chr1.1602	1.88	1.67	1.76	1.5	1.19
KY21.Chr1.1603	3.57	2.64	2.43	1.87	1.63
KY21.Chr1.1604	16.52	7.62	8.98	8.69	7.12
KY21.Chr1.1605	0.12	0.1	0.17	0.15	0.19
KY21.Chr1.1606	35.66	26.45	20.5	16.25	14.32
KY21.Chr1.1607	1.3	1.04	0.44	0.2	0.55
KY21.Chr1.1608	10.37	6.53	5.5	4.46	4.51
KY21.Chr1.1609	2.82	1.66	2.02	1.68	1.62
KY21.Chr1.161	18.15	10.2	10.46	9.55	6.49
KY21.Chr1.1610	24.16	14.82	16.53	14.94	7.75
KY21.Chr1.1611	1.43	1.23	1.14	1.09	0.91
KY21.Chr1.1612	2.9	2.08	1.83	1.35	1.33
KY21.Chr1.1613	1.4	1.29	0.73	0.9	0.74
KY21.Chr1.1614	7.55	4.51	4.45	2.62	1.64
KY21.Chr1.1615	1.05	0.12	0.04	0	0.08
KY21.Chr1.1616	2.54	1.6	1.25	0.62	0.4
KY21.Chr1.1617	2.03	1.4	1.16	1.13	0.72
KY21.Chr1.1618	0.39	0.08	0.03	0	0
KY21.Chr1.1619	0	0	0	0	0
KY21.Chr1.162	0.03	0	0	0	0
KY21.Chr1.1620	0.12	0.09	0.08	0.06	0.02
KY21.Chr1.1621	0	0.01	0	0	0
KY21.Chr1.1622	8.11	7.6	6.27	9.32	6.52
KY21.Chr1.1623	0.08	0.42	0.31	0.47	0.16
KY21.Chr1.1624	0.21	0.07	0.02	0.04	0
KY21.Chr1.1625	0.03	0	0.08	0.04	0.03
KY21.Chr1.1626	0	0	0.05	0.05	0
KY21.Chr1.1627	0	0	0	0	0
KY21.Chr1.1628	0	0	0	0	0
KY21.Chr1.1629	0	0	0	0	0
KY21.Chr1.163	0	0	0	0	0
KY21.Chr1.1630	54.88	44.36	59.39	58.92	49.32
KY21.Chr1.1631	15.64	11.15	8.68	8.21	6
KY21.Chr1.1632	1.53	1.62	1.15	1.28	1.23
KY21.Chr1.1633	15.78	9.5	6.29	7.32	4.54
KY21.Chr1.1634	3.45	1.8	2.25	1.91	1.62
KY21.Chr1.1635	0	0	0	0	0.02
KY21.Chr1.1636	19.62	12.32	12.02	12.48	12.35
KY21.Chr1.1637	52.92	41.32	22.33	18.96	10.72
KY21.Chr1.1638	0.81	0.96	0.52	0.32	0.37
KY21.Chr1.1639	7.59	6.66	4.13	4.76	4.87
KY21.Chr1.164	31.23	20.71	14.41	8.35	8.7
KY21.Chr1.1640	13.16	8.81	7.3	7.66	6.88
KY21.Chr1.1641	128.64	71.64	65.37	60.17	40.77
KY21.Chr1.1642	0	0	0	0	0
KY21.Chr1.1643	0.19	0.29	0	0	0.03
KY21.Chr1.1644	0	0	0	0.1	0
KY21.Chr1.1645	0	0	0	0	0
KY21.Chr1.1646	5.29	4.19	4.62	3.8	3.12
KY21.Chr1.1647	5.38	4	4.19	3.76	3.61
KY21.Chr1.1648	0.38	0.2	0.35	0.32	0.15
KY21.Chr1.1649	12.06	7.02	7.16	7.19	4.17
KY21.Chr1.165	0.99	0.8	0.6	0.63	0.52
KY21.Chr1.1650	1.41	1.03	1.19	0.9	0.36
KY21.Chr1.1651	10.1	7.27	7.95	9.38	7.03
KY21.Chr1.1652	0.32	0	0	0.15	0
KY21.Chr1.1653	17.14	10.2	9.89	11.64	7.85
KY21.Chr1.1654	17.22	10.46	8.51	14.25	7.25
KY21.Chr1.1655	0	0	0	0	0
KY21.Chr1.1656	0	0	0	0.07	0
KY21.Chr1.1657	0.03	0.05	0.12	0.02	0.05
KY21.Chr1.1658	0.02	0.04	0.12	0.09	0.07
KY21.Chr1.1659	2.46	1.5	1.87	1.21	1.3
KY21.Chr1.166	0	0	0	0	0
KY21.Chr1.1660	7.91	4.25	5.79	5.18	3.27
KY21.Chr1.1661	5.81	4.14	3.41	2.36	2.04
KY21.Chr1.1662	4.93	4.93	3.9	2.82	3.36
KY21.Chr1.1663	8.2	6.67	3.89	4.42	3.77
KY21.Chr1.1664	4.75	4.82	4.61	3.44	2.33
KY21.Chr1.1665	38.27	21.02	26.59	39.99	26.55
KY21.Chr1.1666	595.17	758.75	776.73	689.11	549.96
KY21.Chr1.1667	1.2	1.05	0.96	0.79	0.65
KY21.Chr1.1668	0	0	0	0	0
KY21.Chr1.1669	0	0	0	0	0
KY21.Chr1.167	0	0	0	0	0.01
KY21.Chr1.1670	0	0	0	0	0
KY21.Chr1.1671	0	0	0.03	0	0
KY21.Chr1.1672	76.07	59.95	47.7	57.73	41.95
KY21.Chr1.1673	2.22	1.69	1.37	1.62	1.35
KY21.Chr1.1674	19.95	13.63	17.61	27.4	18.28
KY21.Chr1.1675	0.41	0.25	0.59	0.25	0.21
KY21.Chr1.1676	10.17	8.8	8.66	9.25	7.88
KY21.Chr1.1677	15.07	9.91	10.18	11.04	7.63
KY21.Chr1.1678	0.22	0.09	0.13	0.11	0.04
KY21.Chr1.1679	6.55	5.42	5.3	5.63	8.12
KY21.Chr1.168	0.57	0.49	0.34	0.46	0.33
KY21.Chr1.1680	0.75	0.91	0.67	0.61	0.22
KY21.Chr1.1681	3.65	2.46	2.71	1.94	1.61
KY21.Chr1.1682	210.05	157.15	115.88	98.68	67.75
KY21.Chr1.1683	13.91	10.62	11.3	12.31	10.66
KY21.Chr1.1684	1.05	0.86	1.2	1.1	1.16
KY21.Chr1.1685	5.2	3.06	2.16	2.04	2.33
KY21.Chr1.1686	2.88	2.12	1.7	1.27	1.23
KY21.Chr1.1687	10.03	5.4	5.5	4.24	3.36
KY21.Chr1.1688	1.46	1.87	0.79	0.38	0.6
KY21.Chr1.1689	4.91	0.48	0.17	0.51	0.58
KY21.Chr1.169	3.72	3.17	3.01	3.59	4.1
KY21.Chr1.1690	4.99	3.95	3.77	4.07	3.52
KY21.Chr1.1691	85.98	37.44	38.28	35.27	19.2
KY21.Chr1.1692	38.24	25.15	21.1	24.18	22.6
KY21.Chr1.1693	25.07	13.75	13.5	12.31	10.79
KY21.Chr1.1694	0.07	0.05	0.06	0	0
KY21.Chr1.1695	0.66	0.55	0.41	0.71	0.5
KY21.Chr1.1696	0.94	0.96	0.79	0.92	0.71
KY21.Chr1.1697	2.03	1.63	1.37	1.72	1.48
KY21.Chr1.1698	4.78	3.47	2.73	2.81	2.85
KY21.Chr1.1699	0.05	0	0.03	0.03	0.03
KY21.Chr1.17	23.99	16.81	17.04	20.09	20.85
KY21.Chr1.170	0	0.02	0.1	0	0
KY21.Chr1.1700	2.13	1.44	2.72	3.95	5.7
KY21.Chr1.1701	0	0	0.02	0.02	0.02
KY21.Chr1.1702	11.02	9.09	8.71	8.28	6.31
KY21.Chr1.1703	14.18	12.52	10.09	8.94	8.39
KY21.Chr1.1704	8.81	5.26	3.7	4.97	4.3
KY21.Chr1.1705	0	0	0	0	0.01
KY21.Chr1.1706	0.12	0	0.11	0.09	0
KY21.Chr1.1707	0	0	0	0	0
KY21.Chr1.1708	0	0	0	0	0
KY21.Chr1.1709	0.02	0.03	0.04	0.03	0.01
KY21.Chr1.171	27.86	23.39	21.38	14.64	14.01
KY21.Chr1.1710	0	0.17	0	0	0.04
KY21.Chr1.1711	2.67	1.33	1.72	1.63	1.8
KY21.Chr1.1712	0.06	0.39	0.11	0.04	0.02
KY21.Chr1.1713	2.48	1.83	1.64	3.72	3.59
KY21.Chr1.1714	17.53	13.42	9.75	10.65	8.35
KY21.Chr1.1715	46.66	32.16	25.24	23.36	19.98
KY21.Chr1.1716	4.08	1.94	1.64	2.82	1.58
KY21.Chr1.1717	11.22	8.35	7.34	7.76	6.97
KY21.Chr1.1718	0	0.61	0	0	0.14
KY21.Chr1.1719	13.07	8.14	5.1	2.91	3.63
KY21.Chr1.172	32.23	24.46	20.57	19.31	14.41
KY21.Chr1.1720	0	0	0	0	0
KY21.Chr1.1721	2.97	2.24	2.04	1.9	1.69
KY21.Chr1.1722	5.98	3.46	3.56	3.54	2.88
KY21.Chr1.1723	59.57	41.05	34.61	40.98	32.96
KY21.Chr1.1724	2.51	1.7	1.78	1.64	0.85
KY21.Chr1.1725	34.26	21.72	32.81	43.24	31.67
KY21.Chr1.1726	3.68	2.14	2.76	2.09	2.43
KY21.Chr1.1727	19.85	11.46	10.24	9.9	7.26
KY21.Chr1.1728	3.8	2.32	2.08	2.11	2.56
KY21.Chr1.1729	0.45	0.07	0.07	0.03	0.09
KY21.Chr1.173	48.54	29.95	29.15	32.36	14.69
KY21.Chr1.1730	4.97	3.87	2.87	2.84	2.47
KY21.Chr1.1731	225.02	161.93	133.91	77.69	96.31
KY21.Chr1.1732	0	0.05	0.1	0.05	0
KY21.Chr1.1733	0.69	0.67	0.64	0.39	0.43
KY21.Chr1.1734	7.46	6.89	5.25	5.87	5.4
KY21.Chr1.1735	0.03	0	0.04	0.04	0
KY21.Chr1.1736	1.03	0.61	0.76	0.7	0.8
KY21.Chr1.1737	11.57	8.63	8.99	9.66	6.84
KY21.Chr1.1738	0	0	0	0	0
KY21.Chr1.1739	2.87	2.85	1.76	2.01	1.39
KY21.Chr1.174	2.39	1.69	1.32	1.03	0.98
KY21.Chr1.1740	21.68	13.37	9.96	7.28	8.56
KY21.Chr1.1741	3.4	2.78	2.27	1.46	1.71
KY21.Chr1.1742	3.79	3.33	3.84	3.9	4.82
KY21.Chr1.1743	3.08	2.31	1.82	2.56	1.49
KY21.Chr1.1744	4.19	3.45	2.97	3.32	2.64
KY21.Chr1.1745	0	0	0	0	0
KY21.Chr1.1746	0.08	0	0.01	0	0
KY21.Chr1.1747	0	0	0	0	0
KY21.Chr1.1748	0	0	0	0	0
KY21.Chr1.1749	3.4	3.84	3.66	3.71	3.22
KY21.Chr1.175	4.96	3.65	3.39	3.18	3.25
KY21.Chr1.1750	71.43	57.5	48.31	58.37	41.59
KY21.Chr1.1751	0.79	0.35	0.42	0.22	0.13
KY21.Chr1.1752	0.97	0.38	0.21	0.54	0.24
KY21.Chr1.1753	2.83	2.42	1.24	1.25	1.5
KY21.Chr1.1754	1.3	1.35	0.76	0.77	0.95
KY21.Chr1.1755	2.48	1.13	0.5	0.85	0.87
KY21.Chr1.1756	0	0.03	0.03	0	0.05
KY21.Chr1.1757	0	0	0.01	0.01	0
KY21.Chr1.1758	5.69	2.99	4	6.16	8.79
KY21.Chr1.1759	466.86	621.49	658.52	736.12	476.17
KY21.Chr1.176	950.77	772.42	754.98	670.74	486.6
KY21.Chr1.1760	0	0	0	0	0
KY21.Chr1.1761	20.22	10.95	11.43	14.34	9.72
KY21.Chr1.1762	6.47	5.59	4.67	5.15	4.02
KY21.Chr1.1763	0.35	0.26	0.19	0.25	0.12
KY21.Chr1.1764	15.6	8.52	7.98	8.79	5.38
KY21.Chr1.1765	2.04	2.98	2.65	4.13	3.15
KY21.Chr1.1766	0	0	0	0	0
KY21.Chr1.1767	0	0	0	0	0.02
KY21.Chr1.1768	1.4	0.04	0	0.01	0.2
KY21.Chr1.1769	2.9	2.37	1.99	2.78	3.3
KY21.Chr1.177	3.18	2.77	3.43	4.11	3.63
KY21.Chr1.1770	52.83	36.63	32.44	24.52	16.03
KY21.Chr1.1771	4.16	4.28	2.79	2.54	2.19
KY21.Chr1.1772	21.91	11.07	10.41	11.69	7.39
KY21.Chr1.1773	0.69	0.6	0.38	0.51	0.38
KY21.Chr1.1774	4.33	6.24	4.05	5.84	3.67
KY21.Chr1.1775	4	3.04	1.72	2.46	2.05
KY21.Chr1.1776	1.38	1.1	0.93	1.03	0.92
KY21.Chr1.1777	5.09	2.98	2.84	2	1.37
KY21.Chr1.1778	0	0	0	0	0
KY21.Chr1.1779	0.97	0.07	0.04	0	0
KY21.Chr1.178	11.46	7.28	7.11	5.56	5.74
KY21.Chr1.1780	0	0	0	0	0
KY21.Chr1.1781	36.36	23.66	30.99	26.06	13.8
KY21.Chr1.1782	10.7	5.73	5.38	4.63	3.84
KY21.Chr1.1783	21.31	12.8	12.21	11.03	9.38
KY21.Chr1.1784	28.42	19.19	18.1	20.67	18.95
KY21.Chr1.1785	0.09	0.19	0.17	0.1	0.11
KY21.Chr1.1786	6.95	4.03	2.99	3.86	2.66
KY21.Chr1.1787	4.29	2.61	2.16	2.08	1.92
KY21.Chr1.1788	2.75	1.81	2.04	1.84	1.78
KY21.Chr1.1789	3.93	3.21	3	3.41	3.07
KY21.Chr1.179	4.74	3.31	2.76	2.29	1.78
KY21.Chr1.1790	53.71	35.16	28.65	26.99	19.49
KY21.Chr1.1791	4.97	4.04	3.35	3.35	4.18
KY21.Chr1.1792	20.79	15.69	10.77	11.28	8.21
KY21.Chr1.1793	4.37	2.54	2.48	2.3	2.12
KY21.Chr1.1794	9.39	5.23	4.4	2.85	2.69
KY21.Chr1.1795	7.93	5.6	6.43	7.67	3.76
KY21.Chr1.1796	0.78	0.59	0.33	0.37	0.4
KY21.Chr1.1797	0.04	0.03	0.03	0.04	0
KY21.Chr1.1798	16.14	13.4	9.23	8.46	7.1
KY21.Chr1.1799	6.56	3.99	2.21	2.3	1.37
KY21.Chr1.18	41.9	24.73	24.57	26.12	25.93
KY21.Chr1.180	19.47	11.08	10.04	9.51	8.77
KY21.Chr1.1800	83.13	42.15	32.64	35.65	39.82
KY21.Chr1.1801	0.02	0.07	0.01	0	0.1
KY21.Chr1.1802	12.14	7.56	7.42	9.62	7.73
KY21.Chr1.1803	3.63	3.2	2.91	2.57	2.35
KY21.Chr1.1804	0	0	0	0	0
KY21.Chr1.1805	0.77	0.5	0.33	0.48	0.37
KY21.Chr1.1806	2.34	1.22	1.29	1.33	1.1
KY21.Chr1.1807	0.18	0.24	0.1	0.18	0.15
KY21.Chr1.1808	1.52	1.14	0.85	0.68	0.96
KY21.Chr1.1809	2.85	2.22	2.11	1.81	1.71
KY21.Chr1.181	7.1	4.92	4.96	4.3	3.35
KY21.Chr1.1810	1.52	1.43	1.06	1.05	1.07
KY21.Chr1.1811	0.24	0.33	0.43	0.29	0.27
KY21.Chr1.1812	0.44	0.15	0.28	0.18	0.27
KY21.Chr1.1813	2.01	2.09	1.29	1.43	1.25
KY21.Chr1.1814	12.48	5.1	8.59	14.31	11.92
KY21.Chr1.1815	7.19	6.21	4.93	5.22	4
KY21.Chr1.1816	6.09	5.27	4.29	4.6	3.81
KY21.Chr1.1817	116.05	76.72	20.59	27.76	9.68
KY21.Chr1.1818	0.31	0	0.23	0	0
KY21.Chr1.1819	0.77	0.49	0.3	0.46	0.17
KY21.Chr1.182	13.77	8.51	5.48	6.92	4.69
KY21.Chr1.1820	1.45	1.19	0.7	0.89	0.56
KY21.Chr1.1821	13.59	9.81	7.98	8.15	5.85
KY21.Chr1.1822	14.66	7.14	8.58	12.88	9.64
KY21.Chr1.1823	0.82	0.73	0.59	0.55	0.57
KY21.Chr1.1824	1.93	1.77	1.62	2.07	1.78
KY21.Chr1.1825	0	0.06	0.1	0.07	0
KY21.Chr1.1826	11.49	9.76	13.21	15.28	14.14
KY21.Chr1.1827	0.19	1.08	0.81	0.95	0.73
KY21.Chr1.1828	0	0	0	0	0
KY21.Chr1.1829	0	0	0.19	0.09	0.07
KY21.Chr1.183	2.84	2.73	1.84	2.46	2.05
KY21.Chr1.1830	0.85	0	0	0	0
KY21.Chr1.1831	8.57	5.51	5.65	6.63	8.11
KY21.Chr1.1832	3.83	1.76	1.07	2.05	0.76
KY21.Chr1.1833	2.92	1.84	2.5	2.53	1.95
KY21.Chr1.1834	23.75	18.5	14.38	17.02	15.74
KY21.Chr1.1835	86.61	58.02	47.33	35	19.4
KY21.Chr1.1836	14621.9	20118.8	17884.1	19410.3	12774
KY21.Chr1.1837	0.71	0.74	0.65	0.26	0.28
KY21.Chr1.1838	4.73	1.34	0.89	0.79	0.76
KY21.Chr1.1839	0	0	0	0	0
KY21.Chr1.184	2.59	1.99	1.49	1.64	1.14
KY21.Chr1.1840	14.96	13.4	8.75	8.31	6.41
KY21.Chr1.1841	6.43	5.33	3.88	4.01	3.67
KY21.Chr1.1842	5.44	3.45	3.47	3.59	3.37
KY21.Chr1.1843	0.02	0.01	0.03	0.04	0.01
KY21.Chr1.1844	0.2	0.12	0.21	0.18	0.11
KY21.Chr1.1845	2.37	1.48	1.69	1.3	1.56
KY21.Chr1.1846	0.24	0.2	0.13	0.33	0.27
KY21.Chr1.1847	21.67	12.42	11.76	9.73	6.47
KY21.Chr1.1848	0.08	0.39	0.37	0.11	0.18
KY21.Chr1.1849	0.59	0.21	0.15	0.26	0.14
KY21.Chr1.185	5.86	4.47	3.03	3.81	3.01
KY21.Chr1.1850	5.42	4.57	3.08	4.46	3.62
KY21.Chr1.1851	0.02	0.03	0.12	0	0.05
KY21.Chr1.1852	4.62	2.63	2.26	2.11	1.64
KY21.Chr1.1853	1.65	1.19	0.93	0.79	1.07
KY21.Chr1.1854	0.94	1.09	0.87	0.86	0.75
KY21.Chr1.1855	2.63	2.72	2.36	1.91	1.96
KY21.Chr1.1856	11.87	10.22	9.43	10.02	8.32
KY21.Chr1.1857	21.79	9.58	9.05	13.73	8.07
KY21.Chr1.1858	0	0.07	0	0	0
KY21.Chr1.1859	138.78	67.69	70.21	110.79	61.54
KY21.Chr1.186	0.56	0.23	0	0.13	0
KY21.Chr1.1860	13.95	8.42	9.58	10.62	10.95
KY21.Chr1.1861	0.02	0	0.01	0.04	0.01
KY21.Chr1.1862	0	0	0	0	0
KY21.Chr1.1863	0	0	0	0	0
KY21.Chr1.1864	2.37	1.87	1.75	1.75	2.6
KY21.Chr1.1865	18.8	15.61	16.14	24.1	19.15
KY21.Chr1.1866	545.79	338.34	316.64	428.92	253.76
KY21.Chr1.1867	8.68	5.89	3.98	3.42	4.8
KY21.Chr1.1868	0.12	0.05	0	0	0.17
KY21.Chr1.1869	1.43	1.28	0.99	0.89	1.09
KY21.Chr1.187	0	0	0	0	0
KY21.Chr1.1870	0	0	0	0	0
KY21.Chr1.1871	189.73	145.82	177.77	171.32	206.65
KY21.Chr1.1872	1.06	0.87	0.41	0.51	0.94
KY21.Chr1.1873	0	0	0	0	0
KY21.Chr1.1874	9.83	6.37	6.47	8.59	7.17
KY21.Chr1.1875	0.81	0	0.23	0.23	0.53
KY21.Chr1.1876	0	0	0	0.2	0
KY21.Chr1.1877	0	0	0	0	0
KY21.Chr1.1878	3.06	2.21	2.18	2.46	3.15
KY21.Chr1.1879	4.55	2.13	2.91	2.8	2.32
KY21.Chr1.188	22.18	14.46	11.16	11.15	10.11
KY21.Chr1.1880	0	0	0	0	0
KY21.Chr1.1881	0	0	0	0	0
KY21.Chr1.1882	22.43	12.85	15.34	15.19	10.48
KY21.Chr1.1883	1.21	0.85	1.44	0.97	0.5
KY21.Chr1.1884	0	0	0.64	0	0
KY21.Chr1.1885	0	0	0	0.55	0
KY21.Chr1.1886	3.42	2.49	1.62	1.8	1.33
KY21.Chr1.1887	2.87	1.66	1.56	1.2	0.85
KY21.Chr1.1888	5.7	4.3	3.76	4.78	2.72
KY21.Chr1.1889	1.33	0.82	0.78	1.04	0.43
KY21.Chr1.189	36.6	25.63	25.27	30.25	13.79
KY21.Chr1.1890	1.8	1.28	1.26	1.29	1.48
KY21.Chr1.1891	59.75	33.59	34.71	39.08	27.06
KY21.Chr1.1892	21.72	12.53	9.96	7.39	6.35
KY21.Chr1.1893	4.79	3.73	3.08	3.43	3.41
KY21.Chr1.1894	5.16	3.34	4.25	3.4	2.26
KY21.Chr1.1895	2.73	1.6	1.76	1.37	1.22
KY21.Chr1.1896	25.54	1.63	2.98	10.53	3.99
KY21.Chr1.1897	5.86	3.3	1.21	1.48	0.95
KY21.Chr1.1898	0.56	0.25	0.06	0.03	0.01
KY21.Chr1.1899	35.14	36.91	27.43	35.24	22.45
KY21.Chr1.19	5.77	4.28	3.4	3.12	3.49
KY21.Chr1.190	14.64	7.49	4.06	4.93	4.7
KY21.Chr1.1900	31.03	20.97	12.5	10.2	9.87
KY21.Chr1.1901	75.85	44.55	37.96	43.6	35.37
KY21.Chr1.1902	0	0.02	0	0	0
KY21.Chr1.1903	0	0	0	0	0
KY21.Chr1.1904	0	0	0	0	0
KY21.Chr1.1905	2.17	1.48	1.23	1.18	1.37
KY21.Chr1.1906	0	0	0	0	0.66
KY21.Chr1.1907	0	0	0	0	0
KY21.Chr1.1908	0.31	0.41	0.12	0.1	0.25
KY21.Chr1.1909	0	0	0	0	0
KY21.Chr1.191	0.64	0.36	0.54	0.31	0.41
KY21.Chr1.1910	0.02	0	0	0	0
KY21.Chr1.1911	0	0	0	0	0
KY21.Chr1.1912	0	0	0	0	0
KY21.Chr1.1913	0	0	0	0	0
KY21.Chr1.1914	0.18	0.23	0.26	0.15	0.25
KY21.Chr1.1915	1.63	0.98	1.36	0.98	1.85
KY21.Chr1.1916	0.54	0.06	0.09	0.07	0.07
KY21.Chr1.1917	3.58	1.29	0.44	0.25	0.58
KY21.Chr1.1918	12.7	9.8	9.13	8.05	9.28
KY21.Chr1.1919	0	0	0	0	0
KY21.Chr1.192	7.35	4.77	3.47	2.25	1.91
KY21.Chr1.1920	33.29	19.25	19.32	20.93	14.49
KY21.Chr1.1921	8.06	5.94	6.19	6.59	5.98
KY21.Chr1.1922	3.46	3.02	2.77	2.95	2.1
KY21.Chr1.1923	0	0	0	0	1.17
KY21.Chr1.1924	0	0	0	0	0
KY21.Chr1.1925	0	0.04	0	0	0
KY21.Chr1.1926	4.1	3.15	2.25	1.91	1.92
KY21.Chr1.1927	29.56	18.7	18.6	20.38	12.82
KY21.Chr1.1928	10.9	7.93	4.47	3.78	2.9
KY21.Chr1.1929	11.08	7.84	7.29	7.12	5.58
KY21.Chr1.193	2.43	1.34	1.17	1.2	1.31
KY21.Chr1.1930	0.28	0.25	0.23	0.18	0.12
KY21.Chr1.1931	0.52	0.52	0.57	0.9	0.92
KY21.Chr1.1932	3.99	3.24	2.31	1.83	2.75
KY21.Chr1.1933	1.08	0.75	1.1	0.63	0.61
KY21.Chr1.1934	3.54	2.4	2.18	3.06	1.77
KY21.Chr1.1935	1.4	1.04	0.85	1.29	1.49
KY21.Chr1.1936	0	0	0	0	0
KY21.Chr1.1937	33.68	22.6	21.25	22.94	16.13
KY21.Chr1.1938	5.12	3.96	4.28	4.31	4.74
KY21.Chr1.1939	374.45	286.77	271.72	259.36	187.68
KY21.Chr1.194	12.68	8.2	6.69	9.08	5.14
KY21.Chr1.1940	1.74	1.43	1.51	1.83	2.29
KY21.Chr1.1941	1.56	0.47	0.41	0	0.63
KY21.Chr1.1942	2.84	2.61	2.4	1.63	1.76
KY21.Chr1.1943	0	0	0	0.04	0.12
KY21.Chr1.1944	0	0	0.14	0	0
KY21.Chr1.1945	4.81	2.94	3.16	4.58	3.18
KY21.Chr1.1946	5.88	3.12	3.62	3.42	1.86
KY21.Chr1.1947	2143.11	2413.39	2518.5	2608.85	1628.79
KY21.Chr1.1948	3.51	2.93	2.02	2.83	2.01
KY21.Chr1.1949	0.75	0.03	0.06	0	0.04
KY21.Chr1.195	1.94	1.35	0.67	0.82	0.48
KY21.Chr1.1950	3.59	2.1	2.06	1.92	1.54
KY21.Chr1.1951	0.03	0	0	0	0.03
KY21.Chr1.1952	6.84	5.88	5.16	5.72	5.07
KY21.Chr1.1953	2.36	1	0.91	1.07	0.68
KY21.Chr1.1954	1.1	1.32	0.75	1.38	0.75
KY21.Chr1.1955	0.41	0.31	0.33	0.27	0.19
KY21.Chr1.1956	5.38	4.09	2.69	3.39	2.11
KY21.Chr1.1957	3	2.72	2.17	2.52	1.82
KY21.Chr1.1958	4.59	3.41	3.28	3.52	2.81
KY21.Chr1.1959	0	0	0	0	0
KY21.Chr1.196	54.41	32.75	31.58	39.71	26.66
KY21.Chr1.1960	5.64	2.26	2.73	1.86	1.4
KY21.Chr1.1961	5.64	3.39	3.18	3.08	1.91
KY21.Chr1.1962	0.04	0.09	0.1	0.04	0.02
KY21.Chr1.1963	40.71	23.48	20.42	22.26	15.37
KY21.Chr1.1964	6.11	4.79	4.35	4.61	4.3
KY21.Chr1.1965	212.59	125.84	139.22	178.22	87.56
KY21.Chr1.1966	53.24	50.87	33.1	59.59	82.88
KY21.Chr1.1967	0	0	0	0.14	0.11
KY21.Chr1.1968	11.02	7.3	7.01	8.71	5.91
KY21.Chr1.1969	2.02	1.6	1.53	1.49	1.66
KY21.Chr1.197	37.53	27.81	26.64	29.69	26.85
KY21.Chr1.1970	2.22	2.05	1.59	1.19	1.2
KY21.Chr1.1971	1.69	1.16	0.7	0.83	0.7
KY21.Chr1.1972	7.07	4.58	3.86	4.13	2.51
KY21.Chr1.1973	22.46	15.22	13.13	14.74	13.88
KY21.Chr1.1974	8.07	4.65	4.6	4.55	3.58
KY21.Chr1.1975	0	0	0	0	0
KY21.Chr1.1976	0	0	0	0	0
KY21.Chr1.1977	10.75	7.75	6.35	7.97	6.43
KY21.Chr1.1978	17.24	11.13	9	9.5	8.39
KY21.Chr1.1979	17.11	12.39	11.51	13.29	12.12
KY21.Chr1.198	1.52	1.2	1.36	1.42	0.83
KY21.Chr1.1980	0	0	0	0	0
KY21.Chr1.1981	0	0	0	0	0
KY21.Chr1.1982	0.03	0	0	0	0
KY21.Chr1.1983	5.66	4.75	4.45	6.81	6.34
KY21.Chr1.1984	2.09	1.62	1.43	1.62	1.51
KY21.Chr1.1985	0.84	0.5	0.38	0.51	0.45
KY21.Chr1.1986	0.16	0.09	0.09	0.1	0.21
KY21.Chr1.1987	9.7	8.21	7.96	7.36	6.42
KY21.Chr1.1988	0.33	0.3	0.24	0	0.24
KY21.Chr1.1989	0	0	0.02	0	0
KY21.Chr1.199	0.55	0.57	0.79	0.41	0.41
KY21.Chr1.1990	0.22	0.53	0.34	0.44	0.12
KY21.Chr1.1991	0.54	1.04	0.93	1.52	0.51
KY21.Chr1.1992	20.81	28.28	29.51	30.69	14.09
KY21.Chr1.1993	0.01	0	0.02	0.07	0.05
KY21.Chr1.1994	0	0.18	0.23	0.23	0.24
KY21.Chr1.1995	1	0.96	1.33	2.24	1.68
KY21.Chr1.1996	3.42	1.87	2.86	4.94	3.79
KY21.Chr1.1997	1.71	1.38	1.79	3.19	2.75
KY21.Chr1.1998	0	0	0	0	0
KY21.Chr1.1999	4.79	3.88	3.61	3.84	3.91
KY21.Chr1.2	23.27	18.04	15.33	18.65	16.66
KY21.Chr1.20	36.64	26.34	30.13	30.52	19.32
KY21.Chr1.200	6.47	3.89	3.88	4.18	2.25
KY21.Chr1.2000	4.73	3.27	3.56	5.76	2.89
KY21.Chr1.2001	5.65	5.37	4.48	5.36	4.2
KY21.Chr1.2002	9.43	6.2	7.07	6.36	2.92
KY21.Chr1.2003	22.19	17.54	13.29	15.13	8.31
KY21.Chr1.2004	156.2	110.91	82.25	87.56	82.51
KY21.Chr1.2005	0	0	0	0	0
KY21.Chr1.2006	0	0	0	0	0
KY21.Chr1.2007	3.26	1.75	1.16	1.34	0.86
KY21.Chr1.2008	4.84	4.01	2.85	2.92	2.56
KY21.Chr1.2009	0.41	0.37	0.33	0.28	0.18
KY21.Chr1.201	27.65	19.73	25.87	38.85	19.16
KY21.Chr1.2010	0.58	0.34	0.31	0.38	0.16
KY21.Chr1.2011	1.15	0.97	1.18	1.61	1.28
KY21.Chr1.2012	0.68	0.03	0	0	0
KY21.Chr1.2013	21.62	9.38	7.5	7.63	3.76
KY21.Chr1.2014	0	0	0	0	0
KY21.Chr1.2015	19.33	20	14.85	16.95	16.31
KY21.Chr1.2016	22.98	16.3	15.13	8.43	3.89
KY21.Chr1.2017	1.91	1.16	1.59	1.51	1.13
KY21.Chr1.2018	1.16	0.67	0.33	0.58	0.25
KY21.Chr1.2019	0	0	0.02	0.03	0
KY21.Chr1.202	19.85	15.71	21.28	47.19	21.02
KY21.Chr1.2020	0	0	0	0	0
KY21.Chr1.2021	0.03	0.02	0	0	0
KY21.Chr1.2022	0	0	0	0	0
KY21.Chr1.2023	40.65	24.42	20.78	19.65	13.87
KY21.Chr1.2024	12.1	8.79	8.21	8.74	7.3
KY21.Chr1.2025	1.27	0.29	0.16	0.3	0.17
KY21.Chr1.2026	0.73	0.47	0.41	0.34	0.55
KY21.Chr1.2027	0.33	0.27	0.41	0.57	0.5
KY21.Chr1.2028	0.06	0	0	0	0.06
KY21.Chr1.2029	0	0	0	0	0
KY21.Chr1.203	45.75	28.32	27.13	30.72	18.42
KY21.Chr1.2030	16.6	12.54	9.49	10.85	8.63
KY21.Chr1.2031	5.37	4.58	4.89	5.76	5.58
KY21.Chr1.2032	15.24	1.12	0.41	0.27	0.21
KY21.Chr1.2033	0.14	0.23	0.12	0.05	0.13
KY21.Chr1.2034	0	0.13	0.06	0	0
KY21.Chr1.2035	4.88	4.24	5.65	5.82	2.53
KY21.Chr1.2036	0.15	0.13	0.02	0.1	0.18
KY21.Chr1.2037	0.14	0.11	0.1	0.14	0.11
KY21.Chr1.2038	15.56	12.84	9.11	5.17	2.65
KY21.Chr1.2039	0.69	0.45	0.53	0.58	0.51
KY21.Chr1.204	5.4	2.85	2.91	2.8	2.22
KY21.Chr1.2040	0	0	0	0	0
KY21.Chr1.2041	2.05	1.82	1.67	1.73	1.38
KY21.Chr1.2042	1.29	1.62	1	1.66	1.02
KY21.Chr1.2043	7.66	8.49	5.96	6.25	4.36
KY21.Chr1.2044	0	0	0	0	0
KY21.Chr1.2045	19.21	22.07	14.99	18.88	13.56
KY21.Chr1.2046	8.94	5.08	5.19	6.79	6.21
KY21.Chr1.2047	0.72	0.82	0.63	0.84	0.43
KY21.Chr1.2048	18.2	12.96	13.25	15.98	16.56
KY21.Chr1.2049	7.29	5.33	4.36	5.58	4.79
KY21.Chr1.205	6.93	5.38	5.75	4.95	3.82
KY21.Chr1.2050	3.94	2.15	1.98	2.32	1.56
KY21.Chr1.2051	0.02	0.02	0	0.05	0.04
KY21.Chr1.2052	14.37	9.17	6.57	5.64	5.46
KY21.Chr1.2053	1.78	0.65	0.44	0.73	0.73
KY21.Chr1.2054	4.18	2.82	3.15	3.42	3.1
KY21.Chr1.2055	8.04	6.77	5.18	6.02	5.16
KY21.Chr1.2056	29.46	17.17	14.41	13.81	16.99
KY21.Chr1.2057	14.25	8.58	17.01	29.68	20.9
KY21.Chr1.2058	5.77	5.3	4.27	5.06	4.48
KY21.Chr1.2059	0	0	0	0	0
KY21.Chr1.206	20.92	13.28	12.99	11.63	8.86
KY21.Chr1.2060	5.48	2.92	2.59	2.57	1.33
KY21.Chr1.2061	4.99	3.94	2.52	3.63	2.44
KY21.Chr1.2062	12.66	7.19	5.99	6.21	3.11
KY21.Chr1.2063	2366.24	2010.84	2259.18	2102.47	1566.51
KY21.Chr1.2064	11.28	6.39	4.45	5.38	4.63
KY21.Chr1.2065	11.38	7.83	5.86	6.45	6.1
KY21.Chr1.2066	1.91	1.61	1.5	1.93	1.78
KY21.Chr1.2067	5.95	4.48	5.03	4.45	2.96
KY21.Chr1.2068	14.39	10.71	12.31	14.59	10.76
KY21.Chr1.2069	132.09	80.91	67.2	81.28	60.63
KY21.Chr1.207	7.26	5.25	3.87	3.6	2.71
KY21.Chr1.2070	4.57	3.2	3.27	3.39	3.29
KY21.Chr1.2071	23.71	16.73	13.54	8.4	9.8
KY21.Chr1.2072	26.8	17.88	11.98	9.09	10.62
KY21.Chr1.2073	0.09	0	0.09	0	0.09
KY21.Chr1.2074	0.51	0.37	0.19	0.51	0.08
KY21.Chr1.2075	6.43	3.22	0	2.89	0
KY21.Chr1.2076	3.53	3.04	1.95	1.74	2.43
KY21.Chr1.2077	0	0.02	0.02	0.04	0.02
KY21.Chr1.2078	0.05	0.02	0.02	0.05	0.03
KY21.Chr1.2079	8.87	6.85	5.96	6.47	6.86
KY21.Chr1.208	0.04	0.02	0.01	0.06	0.02
KY21.Chr1.2080	4.79	4.12	3.88	4.05	3.52
KY21.Chr1.2081	4.18	2.92	2.69	2.11	1.52
KY21.Chr1.2082	0.13	0.31	0.12	0.08	0.08
KY21.Chr1.2083	71.09	51.48	44.81	30.54	30.32
KY21.Chr1.2084	3.98	2.61	2.66	2.65	2.03
KY21.Chr1.2085	2.15	1.45	1.26	0.92	0.85
KY21.Chr1.2086	1.32	0.74	1.24	1.12	0.53
KY21.Chr1.2087	0	0	0	0	0
KY21.Chr1.2088	20.88	16.15	14.2	10.06	8.92
KY21.Chr1.2089	0.34	0.19	0.18	0.09	0.08
KY21.Chr1.209	28.52	22.85	13.71	15.99	13.1
KY21.Chr1.2090	0.31	0.36	0.51	0.23	0.51
KY21.Chr1.2091	1.29	8.39	16.23	23.98	8.34
KY21.Chr1.2092	0	0	0	0.45	0
KY21.Chr1.2093	15.43	14.45	14.16	22.79	9.85
KY21.Chr1.2094	9.06	5.48	6.39	7.65	8.44
KY21.Chr1.2095	0.05	0.06	0.05	0.05	0.05
KY21.Chr1.2096	5.6	5.23	3.41	4.17	2.95
KY21.Chr1.2097	3.9	2.26	1.86	1.48	0.83
KY21.Chr1.2098	0.5	1.34	1.17	0.39	1.19
KY21.Chr1.2099	0.68	0.16	0.51	0.51	0.32
KY21.Chr1.21	7.73	5.4	4.91	6.54	4.35
KY21.Chr1.210	3.68	3.52	2.79	3.36	2.6
KY21.Chr1.2100	1.06	0.88	0.68	0.74	0.53
KY21.Chr1.2101	0.16	0.03	0.13	0.11	0.04
KY21.Chr1.2102	18.43	13.11	10.33	10.24	11.31
KY21.Chr1.2103	13.5	10.98	8.94	9.85	9.14
KY21.Chr1.2104	0	0	0	0	0
KY21.Chr1.2105	0.04	0	0	0	0
KY21.Chr1.2106	2.06	1.77	1.36	1.69	0.93
KY21.Chr1.2107	6.59	4.89	3.37	3.53	3.29
KY21.Chr1.2108	30.36	31.41	20.49	25.46	18.81
KY21.Chr1.2109	0.41	0.33	0.22	0.4	0.22
KY21.Chr1.211	4.64	3.69	6.97	10.68	8.85
KY21.Chr1.2110	19.05	11.79	7.98	4.25	3.61
KY21.Chr1.2111	4.97	4.14	3.52	4.69	4.51
KY21.Chr1.2112	2.61	1.54	1.68	1.77	1.45
KY21.Chr1.2113	10.37	7.71	6.16	6.1	4.92
KY21.Chr1.2114	0	0	0	0	0.01
KY21.Chr1.2115	8.74	6.41	6.56	7.59	6.31
KY21.Chr1.2116	22.81	13.04	11.17	12.18	8.98
KY21.Chr1.2117	7.71	6.3	4.88	5.35	5.02
KY21.Chr1.2118	15.72	10.5	7.8	10.16	6.9
KY21.Chr1.2119	21.11	12.82	10.41	13.05	9.75
KY21.Chr1.212	0	0	0	0	0.01
KY21.Chr1.2120	24.41	16.79	19.71	22.65	13.01
KY21.Chr1.2121	46.46	28.72	26.24	33.43	22.35
KY21.Chr1.2122	11.01	7.25	7.26	8.91	6.54
KY21.Chr1.2123	0.41	0.34	0.43	0.59	0.46
KY21.Chr1.2124	4.26	2.6	2.59	1.78	1.31
KY21.Chr1.2125	5.44	2.97	3.48	3.43	2.38
KY21.Chr1.2126	4.07	3.62	3.67	4.04	3.33
KY21.Chr1.2127	8.51	4.98	5.36	5.93	3.56
KY21.Chr1.2128	1.27	1.14	0.8	0.85	0.82
KY21.Chr1.2129	47.42	29.02	20.7	15.38	11.33
KY21.Chr1.213	0.3	0.33	0.3	0.47	0.31
KY21.Chr1.2130	6.71	3.93	2.89	2.17	1.78
KY21.Chr1.2131	11.95	9.72	7.41	6.71	6.68
KY21.Chr1.2132	36.65	26.96	23.59	24.53	22.13
KY21.Chr1.2133	1.67	0.78	0.6	0.43	0.46
KY21.Chr1.2134	14.43	11.67	9.08	7.87	6.94
KY21.Chr1.2135	0.65	0.38	0.44	0.28	0.39
KY21.Chr1.2136	44.82	32.41	24.65	22.19	17.59
KY21.Chr1.2137	12.77	9.39	6.41	8	6.48
KY21.Chr1.2138	5.49	3.38	3.93	4.34	4.26
KY21.Chr1.2139	0	0	0	0	0
KY21.Chr1.214	2.8	1.24	1.36	1.9	1.66
KY21.Chr1.2140	0.03	0	0	0	0.01
KY21.Chr1.2141	9.33	6.56	6.14	6.43	5.93
KY21.Chr1.2142	0.58	0.18	0.28	0.22	0.19
KY21.Chr1.2143	0.32	0.18	0.5	0.9	0.61
KY21.Chr1.2144	25.84	13.69	23.56	26.65	22.72
KY21.Chr1.2145	89.11	56.57	87.23	119.61	63.02
KY21.Chr1.2146	0.08	0.05	0.02	0.1	0.06
KY21.Chr1.2147	0.46	0.23	0.19	0.27	0.39
KY21.Chr1.2148	4.26	2.98	2.8	3.9	3.19
KY21.Chr1.2149	0.24	0.37	0.3	0.41	0.21
KY21.Chr1.215	12.05	8.55	5.35	5.01	4.53
KY21.Chr1.2150	0	0	0	0	0
KY21.Chr1.2151	0.08	0.03	0.03	0.01	0.04
KY21.Chr1.2152	154.88	98.96	66.99	53.08	51.95
KY21.Chr1.2153	109.9	85.95	59.99	33.13	31.51
KY21.Chr1.2154	0.08	0	0.06	0	0.01
KY21.Chr1.2155	0.05	0.08	0.13	0	0
KY21.Chr1.2156	0	0	0	0	0
KY21.Chr1.2157	4.52	3.15	2.21	2.16	1.89
KY21.Chr1.2158	71.41	78.3	78.25	95.84	51.29
KY21.Chr1.2159	0	0	0	0	0
KY21.Chr1.216	2.85	2.3	3.04	10	14.96
KY21.Chr1.2160	0.15	0.24	0.14	0.09	0.07
KY21.Chr1.2161	0	0	0	0	0
KY21.Chr1.2162	0.23	0.16	0.19	0.19	0.15
KY21.Chr1.2163	8.59	5.1	5.25	4.9	2.89
KY21.Chr1.2164	2.78	1.43	1.88	2.68	2.83
KY21.Chr1.2165	0.04	0	0.06	0.06	0.06
KY21.Chr1.2166	41.7	25.82	23.68	27.62	22.28
KY21.Chr1.2167	10.95	10.62	8.03	9.79	7.41
KY21.Chr1.2168	6.16	3.89	4.38	4.57	3.29
KY21.Chr1.2169	0.22	0.12	0.14	0.08	0
KY21.Chr1.217	0.1	0.02	0.12	0	0.18
KY21.Chr1.2170	24.37	15.84	13.88	15.72	13.5
KY21.Chr1.2171	3.45	2.41	1.81	2.41	2
KY21.Chr1.2172	1.83	1.79	1.24	1.32	1.27
KY21.Chr1.2173	98.61	71.47	25.75	18.27	10.63
KY21.Chr1.2174	0.68	0.32	0.15	0.15	0.06
KY21.Chr1.2175	0.82	0.22	0.57	0.06	0
KY21.Chr1.2176	2.58	1.57	1.81	1.5	0.75
KY21.Chr1.2177	63.98	43.91	39.22	42.25	44.98
KY21.Chr1.2178	2	1.31	1.79	0.79	0.8
KY21.Chr1.2179	1.21	0.41	0.85	0.28	0.37
KY21.Chr1.218	0	0	0	0	0
KY21.Chr1.2180	1.79	1.11	1.14	1.15	1.14
KY21.Chr1.2181	0.52	0.26	0.5	0.3	0.47
KY21.Chr1.2182	6.39	4.35	5.33	5.95	4.46
KY21.Chr1.2183	0.3	0	0	0.07	0
KY21.Chr1.2184	4.2	2.77	2.84	3.04	2.06
KY21.Chr1.2185	0.04	0	0	0	0
KY21.Chr1.2186	0	0	0	0	0
KY21.Chr1.2187	12.12	0.56	0.08	0.06	0.07
KY21.Chr1.2188	2.83	0.17	0.09	0.09	0.09
KY21.Chr1.2189	0.09	0.08	0.09	0	0.01
KY21.Chr1.219	0.49	0.44	0.91	3.2	2.44
KY21.Chr1.2190	198.61	194.79	182.49	232.52	180.67
KY21.Chr1.2191	0	0	0	0.05	0
KY21.Chr1.2192	0.1	0	0.01	0.01	0
KY21.Chr1.2193	22.73	16.41	18.8	20.06	18.95
KY21.Chr1.2194	7.56	3.81	2.44	3.22	1.64
KY21.Chr1.2195	0.88	0.68	0.54	0.79	0.83
KY21.Chr1.2196	7.65	3.99	4.42	3.92	3.72
KY21.Chr1.2197	3.7	1.85	1.5	1.8	1.7
KY21.Chr1.2198	7.09	5.63	4.1	4.34	3.76
KY21.Chr1.2199	0	0	0	0	0
KY21.Chr1.22	11.57	8.63	7.96	8.48	7.54
KY21.Chr1.220	0.01	0.05	0.14	0.13	0.05
KY21.Chr1.2200	0.18	0.03	0.05	0	0.11
KY21.Chr1.2201	1.58	0.98	0.42	0.45	0.13
KY21.Chr1.2202	0.05	0	0	0	0
KY21.Chr1.2203	0	0	0	0	0
KY21.Chr1.2204	4.72	4.07	3.93	3.2	2.55
KY21.Chr1.2205	21.68	11.33	11.32	11.7	7.75
KY21.Chr1.2206	9.33	7.44	7.61	8.08	6.87
KY21.Chr1.2207	22.29	17.3	12.93	13.55	14.44
KY21.Chr1.2208	99.58	68.48	79.41	75.23	60.08
KY21.Chr1.2209	0.61	0.81	0.55	0.53	0.35
KY21.Chr1.221	3.11	2.28	2.11	1.9	1.14
KY21.Chr1.2210	0	0.43	0	0	0
KY21.Chr1.2211	0	0	0	0	0
KY21.Chr1.2212	5.49	3.99	2.77	3.02	2.61
KY21.Chr1.2213	0	0	0	0	0
KY21.Chr1.2214	22.04	15.05	12.8	10.71	9.81
KY21.Chr1.2215	0	0	0	0	0
KY21.Chr1.2216	0.27	0.09	0.24	0.21	0.02
KY21.Chr1.2217	12.6	8.2	6.11	7.99	7.07
KY21.Chr1.2218	3.5	2.18	2.23	2.05	1.8
KY21.Chr1.2219	21.75	18.69	16.05	12.62	11.73
KY21.Chr1.222	4.8	3.38	3.17	1.96	1.82
KY21.Chr1.2220	4.8	2.68	2.03	1.8	1.85
KY21.Chr1.2221	0.3	0.38	0.32	0.26	0.2
KY21.Chr1.2222	5.38	3.96	3.57	3.82	3.74
KY21.Chr1.2223	20.2	14.34	13.85	15.36	12.97
KY21.Chr1.2224	0	0	0	0	0
KY21.Chr1.2225	101.51	67.12	63.08	55.68	29.57
KY21.Chr1.2226	85.08	64.78	54.67	49.02	32.55
KY21.Chr1.2227	0.96	0.75	0.44	0.64	0.42
KY21.Chr1.2228	4.7	2.47	3.04	1.83	1.68
KY21.Chr1.2229	0	0.15	0	0	0
KY21.Chr1.223	0	0	0.04	0.01	0
KY21.Chr1.2230	0.25	0.17	0.47	0.34	0.07
KY21.Chr1.2231	0.07	0.06	0.05	0	0
KY21.Chr1.2232	9.67	6.43	7.25	6.96	4.94
KY21.Chr1.2233	34.46	23.38	19.29	15.39	12.99
KY21.Chr1.2234	8.24	4.41	3.86	4.36	2.72
KY21.Chr1.2235	0.09	0.14	0.02	0.14	0.14
KY21.Chr1.2236	0.26	0.35	0.26	0.31	0.24
KY21.Chr1.2237	0	0	0	0	0
KY21.Chr1.2238	0.28	0.53	0.2	0.18	0.08
KY21.Chr1.2239	18.6	7.42	8.13	9.29	5.18
KY21.Chr1.224	52.49	25.17	24.83	18.78	11.05
KY21.Chr1.2240	0.1	0.08	0.14	0	0.03
KY21.Chr1.2241	3.42	2.37	2.37	2.24	1.1
KY21.Chr1.2242	9.24	6.94	7.84	10.21	6.52
KY21.Chr1.2243	0	0	0	0	0
KY21.Chr1.2244	6.41	3.55	3.75	3.37	2.88
KY21.Chr1.2245	8.47	5.28	5.8	3.66	2.3
KY21.Chr1.2246	7.41	6	6.38	4.46	3.59
KY21.Chr1.2247	1.93	1.07	1.8	1.71	0.6
KY21.Chr1.2248	6.27	4.9	4.82	6.48	4.9
KY21.Chr1.2249	0.44	0.21	0.06	0.31	0.05
KY21.Chr1.225	16.72	10.94	10.63	12.48	8.82
KY21.Chr1.2250	10.09	6.13	7.05	6.38	4.68
KY21.Chr1.2251	0	0	0	0	0.07
KY21.Chr1.2252	37.28	29.82	34.03	28.77	25.31
KY21.Chr1.2253	82.9	59.21	62.06	50.87	44.08
KY21.Chr1.2254	13.88	9.04	9.27	9.76	8.04
KY21.Chr1.2255	19.8	17.5	14.96	16.18	12.06
KY21.Chr1.2256	9.27	7.03	5.01	6.95	3.48
KY21.Chr1.2257	15.24	8.1	7.94	7.47	5.1
KY21.Chr1.2258	5.84	4.85	4.41	4.69	3.79
KY21.Chr1.2259	45.98	30.18	29.38	22.09	11.18
KY21.Chr1.226	277.92	210.86	201.22	188.27	151.31
KY21.Chr1.2260	1.94	1.14	1.11	0.61	0.28
KY21.Chr1.2261	14.86	10.07	8.9	11.75	5.73
KY21.Chr1.2262	7.32	6.79	4.82	4.78	4.18
KY21.Chr1.2263	190.66	131.66	133.21	159.01	90.69
KY21.Chr1.2264	7.75	5.43	5.71	5.18	3.83
KY21.Chr1.2265	0	0	0	0.05	0
KY21.Chr1.2266	6.37	3.45	2.54	3.7	2.73
KY21.Chr1.2267	0.04	0	0.06	0.12	0
KY21.Chr1.2268	0	0	0.09	0.09	0.17
KY21.Chr1.2269	0.14	0.07	0.07	0.07	0.05
KY21.Chr1.227	4.29	3.61	3.46	3.38	3.74
KY21.Chr1.2270	0.1	0.08	0.21	0.07	0.03
KY21.Chr1.228	33.54	21.72	16.54	15.03	9.32
KY21.Chr1.229	14.15	10.56	7.22	6.63	4.56
KY21.Chr1.23	9.86	6.91	6.28	6.45	4.75
KY21.Chr1.230	72.17	59.75	66.55	85.83	73.83
KY21.Chr1.231	0	0	0	0	0
KY21.Chr1.232	0	0	0	0	0
KY21.Chr1.233	1.14	1	0.82	0.85	0.62
KY21.Chr1.234	8.5	7.08	4.05	3.11	1.76
KY21.Chr1.235	5.3	4.89	3.92	4.65	4.23
KY21.Chr1.236	0.13	0.1	0	0.04	0.07
KY21.Chr1.237	2.15	1.59	1.19	1.5	0.92
KY21.Chr1.238	10.25	6.04	5.39	6.89	5.76
KY21.Chr1.239	7.46	5.09	6.06	5.94	5.86
KY21.Chr1.24	0.99	0.72	0.63	0.57	0.13
KY21.Chr1.240	3.16	2.59	2.62	2.66	2.62
KY21.Chr1.241	0.09	0.43	0.24	0.1	0.13
KY21.Chr1.242	16.18	12.01	9.27	9.06	6.14
KY21.Chr1.243	0	0	0	0	0
KY21.Chr1.244	0.02	0	0	0	0
KY21.Chr1.245	1.39	1.24	0.84	1.01	0.69
KY21.Chr1.246	21.65	11.96	11.42	12.81	6.8
KY21.Chr1.247	18.35	14.58	11.18	14.4	8.21
KY21.Chr1.248	12.48	10.09	10.37	10.68	11.53
KY21.Chr1.249	4.32	3.21	3.66	2.92	3.23
KY21.Chr1.25	10.79	6.05	7.76	6.79	4.86
KY21.Chr1.250	10.45	6.75	4.91	5.15	4.05
KY21.Chr1.251	1.43	0.81	1.3	2.54	3.79
KY21.Chr1.252	0.74	0.54	0.39	0.29	0.31
KY21.Chr1.253	0	0	0	0	0
KY21.Chr1.254	158.32	110.82	94.78	89.11	88.28
KY21.Chr1.255	0.11	0.05	0.11	0.03	0.1
KY21.Chr1.256	16.73	8.92	7.1	8.55	4.45
KY21.Chr1.257	18.37	13.76	11.17	12.75	12.84
KY21.Chr1.258	79	51.38	58.63	81.36	67.37
KY21.Chr1.259	5.87	3.8	3.32	3.67	2.62
KY21.Chr1.26	65.64	39.64	34.69	21.69	15.78
KY21.Chr1.260	28.8	20.63	15.79	16.77	14.66
KY21.Chr1.261	15.08	8.44	5.94	6.56	4.33
KY21.Chr1.262	1.12	0.69	0.51	0.76	0.58
KY21.Chr1.263	43.96	24.26	20.13	14.49	11.13
KY21.Chr1.264	0.2	0	0.07	0.07	0
KY21.Chr1.265	0.47	2.77	3.12	1.56	0.8
KY21.Chr1.266	9.09	8.09	11.17	9.26	10.03
KY21.Chr1.267	463.07	511.19	490.74	481.35	353.84
KY21.Chr1.268	81.1	73.21	76.89	78.27	62.58
KY21.Chr1.269	0	0.59	1.86	0	0.23
KY21.Chr1.27	0.18	0	0	0.03	0.03
KY21.Chr1.270	3054.91	3922.54	4025.11	3835.22	3072.1
KY21.Chr1.271	13.62	11.43	7.68	11.02	8.39
KY21.Chr1.272	15.59	10.52	13.7	13.09	12.93
KY21.Chr1.273	0	0	0	0	0
KY21.Chr1.274	34.51	32.76	38.95	27.89	20.81
KY21.Chr1.275	1.1	1.14	0.88	0.67	0.49
KY21.Chr1.276	0.2	0.04	0.06	0.06	0.05
KY21.Chr1.277	0.14	0.07	0.07	0.04	0.04
KY21.Chr1.278	0.17	0.05	0.1	0.16	0
KY21.Chr1.279	47.96	31.92	21.09	18.99	13.57
KY21.Chr1.28	0.4	0.09	0	0	0
KY21.Chr1.280	32.39	19.96	16.72	16.15	11.13
KY21.Chr1.281	0	0	0	0.01	0.01
KY21.Chr1.282	7.77	3.96	4.89	4.71	3.7
KY21.Chr1.283	4.43	2.62	3.47	3.42	2.05
KY21.Chr1.284	7.68	6.2	4.53	4.48	4.98
KY21.Chr1.285	9.27	7.58	5.15	4.54	6.43
KY21.Chr1.286	49.52	23.32	18.15	11.93	2.85
KY21.Chr1.287	0	0	0	0	0
KY21.Chr1.288	3.34	2.02	1.79	1.81	1.23
KY21.Chr1.289	88.92	46.65	40.38	36.4	29.12
KY21.Chr1.29	0.83	0.21	0.06	0.2	0
KY21.Chr1.290	0.16	0.1	0.06	0	0
KY21.Chr1.291	0	0	0	0	0
KY21.Chr1.292	0	0	0	0	0
KY21.Chr1.293	2.48	1.39	0.84	1.01	1.33
KY21.Chr1.294	59.23	35.78	22.25	16.73	15.09
KY21.Chr1.295	0.5	0.25	0.21	0.31	0.23
KY21.Chr1.296	1.76	1.25	0.78	0.95	1.25
KY21.Chr1.297	0	0	0	0.02	0
KY21.Chr1.298	20.42	14.06	9.87	9.3	8.2
KY21.Chr1.299	2.95	2.44	1.64	1.99	2.78
KY21.Chr1.3	3.33	2.15	1.49	1.41	1.22
KY21.Chr1.30	0	0	0	0	0
KY21.Chr1.300	0	0	0	0	0
KY21.Chr1.301	7.72	5.73	4.67	4.15	4.05
KY21.Chr1.302	0.17	0.27	0.27	0.1	0.13
KY21.Chr1.303	1.48	1.06	0.14	0.18	0.08
KY21.Chr1.304	2.57	1.08	1.05	0.77	0.46
KY21.Chr1.305	0.13	0.02	0.05	0	0
KY21.Chr1.306	7.6	5.65	5.57	4.99	3.51
KY21.Chr1.307	83.93	62.33	59.23	56.46	44.13
KY21.Chr1.308	17.09	12.51	8.85	8.05	7.34
KY21.Chr1.309	5.23	2.96	4.36	4.26	2.49
KY21.Chr1.31	0.03	0	0	0	0
KY21.Chr1.310	0	0	0	0	0
KY21.Chr1.311	0.65	0.29	0.29	0.29	0.1
KY21.Chr1.312	0	0	0	0	0
KY21.Chr1.313	5.25	3.07	2.63	2.25	2.26
KY21.Chr1.314	0.01	0.01	0	0.01	0.02
KY21.Chr1.315	0	0	0	0	0
KY21.Chr1.316	4.12	5.81	3.51	2.95	3.75
KY21.Chr1.317	7.22	6.36	5.93	4.79	4.99
KY21.Chr1.318	3.46	2.22	1.33	1.67	1.63
KY21.Chr1.319	0	0	0	0	0
KY21.Chr1.32	31.48	16.35	14.23	10.23	11.6
KY21.Chr1.320	0.43	0.26	0.42	0.38	0.39
KY21.Chr1.321	0	0	0	0	0
KY21.Chr1.322	37.9	25.35	24.53	24.33	23.28
KY21.Chr1.323	0	0	13.87	0	0
KY21.Chr1.324	1.83	1.01	1.48	1.33	0.34
KY21.Chr1.325	0.12	0.19	0.33	0.33	0.19
KY21.Chr1.326	0.03	0.03	0.02	0.04	0.09
KY21.Chr1.327	0	0	0	0	0
KY21.Chr1.328	0	0	0.03	0.03	0
KY21.Chr1.329	1.07	0.48	0.51	0.48	0.35
KY21.Chr1.33	69.42	36.5	27.26	23.07	23.35
KY21.Chr1.330	2.78	2.34	2.55	2.13	1.89
KY21.Chr1.331	0.48	0.53	0.41	0.33	0.13
KY21.Chr1.332	5.58	5.28	3.87	4.47	4.55
KY21.Chr1.333	0	0.02	0.02	0	0
KY21.Chr1.334	0.79	0.14	0.05	0.02	0.05
KY21.Chr1.335	0.11	0	0	0	0
KY21.Chr1.336	0.29	0.17	0.08	0.05	0.08
KY21.Chr1.337	0	0.14	0	0	0
KY21.Chr1.338	0.03	0.13	0	0	0.01
KY21.Chr1.339	0.28	0.26	0.28	0.33	0.26
KY21.Chr1.34	55.94	36.89	18.32	9.73	8.97
KY21.Chr1.340	1.3	0.27	0.59	0.51	0.35
KY21.Chr1.341	2.29	2.01	1.48	1.24	0.97
KY21.Chr1.342	0.18	0.14	0.22	0.09	0.17
KY21.Chr1.343	2.5	1.58	1.67	1.36	1.46
KY21.Chr1.344	1.68	1.23	1.19	1.04	1.11
KY21.Chr1.345	3.93	2.35	2.28	2.15	2.16
KY21.Chr1.346	1.63	1.52	1.1	0.84	0.9
KY21.Chr1.347	1.33	1.03	0.85	1.08	0.75
KY21.Chr1.348	2.85	1.72	2.11	2.33	1.18
KY21.Chr1.349	17.7	13.3	19.22	20.16	12.58
KY21.Chr1.35	12.76	7.34	5.58	8.45	5.64
KY21.Chr1.350	14.8	10.92	11.82	10.9	10.34
KY21.Chr1.351	11.96	9.37	7.98	9.9	8.99
KY21.Chr1.352	13.41	11.27	11.56	8.22	8.15
KY21.Chr1.353	5.4	4.04	3.67	3.88	3.64
KY21.Chr1.354	3.45	2.63	2.51	2.8	2.32
KY21.Chr1.355	0.14	0.07	0.09	0.09	0.07
KY21.Chr1.356	0	0.69	0.03	0	0.75
KY21.Chr1.357	8.51	4.89	3.85	5.18	3.03
KY21.Chr1.358	8.46	6.61	5.37	5.95	5.56
KY21.Chr1.359	1.67	1.32	1.43	1.13	1.24
KY21.Chr1.36	8.95	6.46	4.18	4.58	2.67
KY21.Chr1.360	1.05	0.95	0.88	1.63	1.41
KY21.Chr1.361	0.63	0.59	0.4	0.38	0.24
KY21.Chr1.362	0.07	0	0	0	0
KY21.Chr1.363	0	0	0.01	0	0
KY21.Chr1.364	0.83	0.32	0.46	0.3	0.49
KY21.Chr1.365	12.5	10.39	8.46	11.36	11.88
KY21.Chr1.366	0	0	0	0	0
KY21.Chr1.367	0	0	0	0.15	0
KY21.Chr1.368	0	0	0	0.04	0
KY21.Chr1.369	0	0	0	0	0
KY21.Chr1.37	14.04	11.36	8.85	11.47	9.54
KY21.Chr1.370	0.83	0.68	0.58	0.77	0.6
KY21.Chr1.371	5.93	4.82	3.88	4.32	5.15
KY21.Chr1.372	2.09	1.37	1.14	2.09	2.54
KY21.Chr1.373	0.08	0.03	0.05	0.07	0.01
KY21.Chr1.374	5.01	3.18	7.07	17.95	9.62
KY21.Chr1.375	3.73	2.49	2.31	1.73	1.62
KY21.Chr1.376	1.68	0.83	0.91	0.61	0.53
KY21.Chr1.377	11.52	10.34	8.52	5.13	3.88
KY21.Chr1.378	0	0	0	0	0
KY21.Chr1.379	0	0	0	0	0
KY21.Chr1.38	7.53	6.07	4.02	3.37	3.5
KY21.Chr1.380	0	0	0	0	0
KY21.Chr1.381	1.04	0.74	0.59	0.35	0.47
KY21.Chr1.382	4.73	3.71	2.31	1.83	1.75
KY21.Chr1.383	0.81	0.34	0.24	0.19	0.11
KY21.Chr1.384	64.95	53.56	54.28	62.96	34.95
KY21.Chr1.385	0	0	1.67	0	0
KY21.Chr1.386	0	0	0	0.12	0.09
KY21.Chr1.387	0	0	0	0	0
KY21.Chr1.388	0.18	0.2	0.37	0.22	0.29
KY21.Chr1.389	0	0	0	0	1.73
KY21.Chr1.39	60.33	31.51	32.52	56.73	15.65
KY21.Chr1.390	0.5	0.39	0.26	0.11	0.11
KY21.Chr1.391	22.31	13.46	12.85	15.55	10.55
KY21.Chr1.392	0	0	0.03	0	0
KY21.Chr1.393	0.14	0.15	0.1	0.13	0.08
KY21.Chr1.394	13.58	12.02	21.48	18.84	19.68
KY21.Chr1.395	9.61	6.45	8.76	10.68	17.23
KY21.Chr1.396	0.17	0.05	0	0	0.03
KY21.Chr1.397	255.36	164.83	163.95	207.33	141.35
KY21.Chr1.398	16.46	12.42	10.6	11.4	8.21
KY21.Chr1.399	0.05	0.06	0.04	0.04	0.03
KY21.Chr1.4	120.31	88.9	82.01	79.78	70.7
KY21.Chr1.40	0.3	0	0.1	0.2	0.32
KY21.Chr1.400	0	0	0	0	0
KY21.Chr1.401	0.66	0.24	0.28	0.38	0.65
KY21.Chr1.402	0.16	0	0.01	0.01	0
KY21.Chr1.403	0.69	0.7	0.35	0.47	0.27
KY21.Chr1.404	0	0	0	0	0
KY21.Chr1.405	0.18	0.17	0.21	0.06	0.05
KY21.Chr1.406	0.26	0.14	0.41	0.85	0.2
KY21.Chr1.407	6.17	5.12	6.07	10.52	5.67
KY21.Chr1.408	2793.28	1851.04	2646.12	4399.54	3527.76
KY21.Chr1.409	7.24	5.59	4.88	4.2	4.34
KY21.Chr1.41	0	0	0.05	0	0
KY21.Chr1.410	0	0	0	0	0
KY21.Chr1.411	0.03	0.01	0	0.01	0
KY21.Chr1.412	0	0	0	0	0
KY21.Chr1.413	0.01	0	0	0.02	0
KY21.Chr1.414	0	0	0	0	0
KY21.Chr1.415	18.05	9.55	7.7	9.59	5.48
KY21.Chr1.416	1362.74	1082.48	1238.93	1188.23	939.38
KY21.Chr1.417	6.76	5.4	4.49	3.54	4.04
KY21.Chr1.418	1.99	1.05	0.71	0.61	0.51
KY21.Chr1.419	1.9	1.04	1.19	1.03	0.92
KY21.Chr1.42	0	0	0	0	0
KY21.Chr1.420	0.64	0.59	0.52	0.63	0.34
KY21.Chr1.421	0.13	0.1	0.28	0.11	0.03
KY21.Chr1.422	0.33	0.16	0.08	0	0.18
KY21.Chr1.423	6.46	2.21	1.22	0.98	0.26
KY21.Chr1.424	13.31	8.59	8.89	8.83	6.08
KY21.Chr1.425	1.8	1.57	1.11	1.29	0.92
KY21.Chr1.426	0.31	0.44	0.39	0.51	0.17
KY21.Chr1.427	8.72	6.39	7.25	7.55	4.92
KY21.Chr1.428	14.7	10.98	11.97	13.44	11.87
KY21.Chr1.429	4.16	2.87	3.5	5.26	2.68
KY21.Chr1.43	0	0	0	0	0
KY21.Chr1.430	6.82	5.46	4.53	5	5.23
KY21.Chr1.431	2.47	3.07	1.84	1.43	1.56
KY21.Chr1.432	0.99	0	0	0	0.01
KY21.Chr1.433	0.06	0.07	0	0.03	0.01
KY21.Chr1.434	14.82	10.48	4.46	4.18	7.14
KY21.Chr1.435	1.5	0.59	0.36	0.33	0.08
KY21.Chr1.436	0.44	0.47	0	1.35	1.04
KY21.Chr1.437	1209.34	748.67	642.28	597.27	516.78
KY21.Chr1.438	0.08	0.07	0.12	0.06	0.02
KY21.Chr1.439	0	0	0	0	0
KY21.Chr1.44	10.74	8.46	5.06	6.49	3.87
KY21.Chr1.440	0	0	0	0	0
KY21.Chr1.441	0.68	0.35	0.17	0.16	0.13
KY21.Chr1.442	2.33	1.37	2.13	1.21	0.63
KY21.Chr1.443	0.79	0.19	0.23	0.27	0.28
KY21.Chr1.444	2.65	4.01	5.02	1.76	4.98
KY21.Chr1.445	0	0	0	0	0
KY21.Chr1.446	0	0	0	0	0
KY21.Chr1.447	0.42	0.44	0.35	0.36	0.24
KY21.Chr1.448	35.22	36.5	28.91	37.93	25.89
KY21.Chr1.449	5.69	2.84	2.79	3.11	2.4
KY21.Chr1.45	11.72	7.92	7.2	6.28	5.39
KY21.Chr1.450	12.95	7.3	6.68	6.72	4.79
KY21.Chr1.451	32.85	24.04	18.07	26.22	17.27
KY21.Chr1.452	4.17	3.07	3.28	4.09	3.18
KY21.Chr1.453	22.74	14.64	12.73	11.34	12.21
KY21.Chr1.454	19.82	10.25	9.13	6.42	3.38
KY21.Chr1.455	9.22	5.49	4.88	6.12	3.13
KY21.Chr1.456	5.57	4.23	4.23	3.25	2.72
KY21.Chr1.457	5.08	3.3	2.59	2.99	1.3
KY21.Chr1.458	5.92	3.65	3.74	3.24	2.62
KY21.Chr1.459	76.19	50.35	58.43	49.28	43.14
KY21.Chr1.46	19.82	13.4	10.14	9.43	9.63
KY21.Chr1.460	1.72	10.12	3	0	4.46
KY21.Chr1.461	0	0	0	0	0
KY21.Chr1.462	28.02	14.54	10.7	18.1	13.79
KY21.Chr1.463	8.23	4.38	5.04	5.89	4.44
KY21.Chr1.464	0	0.05	0.02	0.09	0.04
KY21.Chr1.465	0.63	0.25	0.3	0.47	0.23
KY21.Chr1.466	0.39	0.24	0.37	0.37	0.25
KY21.Chr1.467	26.39	17.23	15.11	14.13	10.26
KY21.Chr1.468	20.57	11.31	8.87	10.24	4.93
KY21.Chr1.469	0.01	0.01	0.05	0.04	0.05
KY21.Chr1.47	19.56	11.49	10.02	10.32	7.86
KY21.Chr1.470	0	0	0	0	0
KY21.Chr1.471	0	0	0	0	0
KY21.Chr1.472	0	0	0	0	0
KY21.Chr1.473	0	0	0	0	0
KY21.Chr1.474	3.62	0.21	0.01	0.02	0.03
KY21.Chr1.475	0.33	0.18	0.18	0.23	0.16
KY21.Chr1.476	4.81	3.58	2.98	3.6	3.31
KY21.Chr1.477	8.26	4.34	5	6.04	3.76
KY21.Chr1.478	0	0	0	0	0
KY21.Chr1.479	6.45	3.96	4.71	3.93	3.52
KY21.Chr1.48	0.08	0.03	0.01	0.03	0.02
KY21.Chr1.480	16.71	11.89	11.57	13.1	12.23
KY21.Chr1.481	4.13	2.32	2.13	1.91	1.51
KY21.Chr1.482	9.54	5.68	4.29	5.15	4.61
KY21.Chr1.483	3.76	2.61	1.88	1.26	1.33
KY21.Chr1.484	12.74	11.73	9.94	11.14	12.7
KY21.Chr1.485	19.77	12.59	12.54	17.33	14.52
KY21.Chr1.486	0.19	0.77	0	0.14	0.1
KY21.Chr1.487	3.04	3.96	2.59	2.5	2.1
KY21.Chr1.488	2.99	2.17	1.95	2.02	2.05
KY21.Chr1.489	6.78	4.97	4.7	4	2.75
KY21.Chr1.49	0	0.05	0	0.12	0.03
KY21.Chr1.490	0.65	0.36	0.28	0.1	0.51
KY21.Chr1.491	2.94	0.07	0.02	0	0
KY21.Chr1.492	6.84	4.31	3.79	4.4	2.81
KY21.Chr1.493	10.23	6.1	6.79	6.63	6.11
KY21.Chr1.494	0.2	0.07	0.06	0.08	0.01
KY21.Chr1.495	0.52	0.01	0.01	0.01	0.01
KY21.Chr1.496	0	0	0	0	0
KY21.Chr1.497	0	0	0	0	0
KY21.Chr1.498	1.46	0.14	0.09	0.06	0.07
KY21.Chr1.499	27.44	20.17	17.55	19.51	15.42
KY21.Chr1.5	4.96	3.68	2.83	2.74	2.85
KY21.Chr1.50	0.84	0.37	0.62	0.88	1.09
KY21.Chr1.500	6761	9108.73	10052.9	10255	7120.02
KY21.Chr1.501	7.43	4.77	4.15	4.76	2.92
KY21.Chr1.502	5.45	3.46	3.04	3.77	2.26
KY21.Chr1.503	1.64	1.55	1.45	1.76	1.77
KY21.Chr1.504	5.64	5.21	4.17	4.45	4.11
KY21.Chr1.505	1.26	1.13	1.03	1.12	1.02
KY21.Chr1.506	6.04	3.55	2.42	3.9	2.8
KY21.Chr1.507	4.4	2.31	1.98	2.66	0.89
KY21.Chr1.508	266.93	467.18	369.71	497.72	327.25
KY21.Chr1.509	84.06	66.44	66.54	60.83	56.19
KY21.Chr1.51	0	0	0	0	0
KY21.Chr1.510	0.86	0.82	0.6	0.69	0.59
KY21.Chr1.511	0	0	0	0	0.65
KY21.Chr1.512	0.22	0.26	0.13	0.3	0.22
KY21.Chr1.513	0.15	0.1	0.06	0.19	0.19
KY21.Chr1.514	4.2	3.95	2.56	3.5	2.72
KY21.Chr1.515	3.55	1.94	2.13	1.95	0.72
KY21.Chr1.516	4.88	3.63	3.86	4.4	5.95
KY21.Chr1.517	0.08	0	0	0	0
KY21.Chr1.518	0.98	0.88	0.8	0.95	1.24
KY21.Chr1.519	4.89	4.05	2.92	3.17	3.43
KY21.Chr1.52	1.27	1.43	1.59	1.42	1.51
KY21.Chr1.520	0.51	0.45	0.52	0.34	0.36
KY21.Chr1.521	0	0.09	0.05	0	0.08
KY21.Chr1.522	1.83	0.22	0.58	1.94	0.45
KY21.Chr1.523	0.42	0.36	0.09	0.13	0.23
KY21.Chr1.524	68.73	95.06	84.85	97.5	72.7
KY21.Chr1.525	0.56	0	0.89	0	1.68
KY21.Chr1.526	7.45	5.63	5.43	5.66	5.9
KY21.Chr1.527	129.52	81.2	88.65	100.39	71.68
KY21.Chr1.528	0	0.02	0.08	0	0.02
KY21.Chr1.529	7.62	4.96	2.47	2.51	2.83
KY21.Chr1.53	0.65	0.69	0	0	0.63
KY21.Chr1.530	2.73	1.48	2.25	3.35	2.57
KY21.Chr1.531	16.21	8.86	11.62	11.24	8.75
KY21.Chr1.532	0	0	0	0	0
KY21.Chr1.533	11.28	6.96	5.14	5.5	3.43
KY21.Chr1.534	475.35	270.22	274.49	288.88	192.91
KY21.Chr1.535	1.87	1.22	0.75	0.46	0.33
KY21.Chr1.536	3.49	2.09	1.71	2.1	1.38
KY21.Chr1.537	3.06	2.58	2.53	2.44	1.65
KY21.Chr1.538	0.28	0.1	0.39	0.36	0.14
KY21.Chr1.539	10.93	6.15	5.24	5.96	4.57
KY21.Chr1.54	0.64	0.86	1.43	0.79	1.12
KY21.Chr1.540	0.01	0	0	0	0.01
KY21.Chr1.541	5.1	5.15	4.55	5.63	4.37
KY21.Chr1.542	0	0	0	0	0
KY21.Chr1.543	0.04	0.15	0.16	0.05	0.25
KY21.Chr1.544	0.03	0	0.04	0	0.01
KY21.Chr1.545	0.47	0.05	0.04	0.24	0.11
KY21.Chr1.546	0	0	0	0	0
KY21.Chr1.547	0	0	0	0	0
KY21.Chr1.548	0	0	0	0	0
KY21.Chr1.549	0	0	0	0	0
KY21.Chr1.55	1.29	1.58	1.14	1.14	1.43
KY21.Chr1.550	0	0	0	0	0.08
KY21.Chr1.551	0.04	0.06	0.01	0	0.01
KY21.Chr1.552	1.18	0.59	0.61	0.45	0.51
KY21.Chr1.553	12.57	6.65	4.98	5.83	3.56
KY21.Chr1.554	1.17	1	0.48	0.09	0.06
KY21.Chr1.555	2.69	1.3	1.01	0.18	0.02
KY21.Chr1.556	0	0.48	0	0	0
KY21.Chr1.557	58.69	45.68	30.79	20.23	28.92
KY21.Chr1.558	0.05	0.04	0.04	0	0.03
KY21.Chr1.559	140.91	82.64	71.12	68.4	48.99
KY21.Chr1.56	2.06	2.57	2.78	2.32	2.8
KY21.Chr1.560	2265.97	1584.41	1702.42	1606.65	1386.29
KY21.Chr1.561	2.85	1.7	1.15	1.3	1.07
KY21.Chr1.562	9.57	5.82	5.35	5.66	5.39
KY21.Chr1.563	8.09	6.1	5.36	6.22	5.36
KY21.Chr1.564	8.73	6.99	6.63	7.12	6.64
KY21.Chr1.565	0	0	0	0	0.02
KY21.Chr1.566	0	0	0	0	0
KY21.Chr1.567	1561.78	926.95	943.38	400.22	203.24
KY21.Chr1.568	14.21	7.84	8.05	7.58	4.63
KY21.Chr1.569	0.17	0	0.04	0.08	0.06
KY21.Chr1.57	23.77	18.92	17.24	13.73	9.88
KY21.Chr1.570	0	0.07	0	0.14	0.03
KY21.Chr1.571	0	0	0	0	0.03
KY21.Chr1.572	0	0	0	0	0
KY21.Chr1.573	30.75	17.8	12.81	12.46	7.56
KY21.Chr1.574	1.5	1.23	0.68	1.22	0.31
KY21.Chr1.575	0	0	0	0	0.01
KY21.Chr1.576	3.61	2.81	2.91	2.99	2.78
KY21.Chr1.577	3.82	2.78	2.41	1.4	2.02
KY21.Chr1.578	2.66	2.05	2.46	2.47	1.45
KY21.Chr1.579	0.19	0.15	0	0.4	0.1
KY21.Chr1.58	0	0	0	0	0
KY21.Chr1.580	0.07	0.09	0.14	0.06	0.02
KY21.Chr1.581	0	0	0	0	0
KY21.Chr1.582	23.02	17.67	18.19	25.52	19.62
KY21.Chr1.583	0	0	0.05	0	0
KY21.Chr1.584	9.77	7.83	6.88	7.67	7.25
KY21.Chr1.585	10.89	9.36	5.62	6.1	2.57
KY21.Chr1.586	41.08	27.43	27.95	28.08	22.67
KY21.Chr1.587	5.68	2.43	4.27	5.23	6.74
KY21.Chr1.588	0.03	0.02	0.04	0.07	0.04
KY21.Chr1.589	0.09	0.03	0.02	0.02	0.01
KY21.Chr1.59	25.95	19.11	16.08	11.84	8.59
KY21.Chr1.590	17.64	10.01	7.27	6.77	7.3
KY21.Chr1.591	20.56	13.47	9.24	7.67	7.1
KY21.Chr1.592	0	0	0	0	0
KY21.Chr1.593	6.21	3.62	2.25	2.11	2.44
KY21.Chr1.594	2.01	0.93	1.56	1.31	1.07
KY21.Chr1.595	1.19	1.84	1.04	0.83	0.8
KY21.Chr1.596	7.59	6.07	5.02	5.55	5.88
KY21.Chr1.597	6.4	3.45	4.52	4.85	4.21
KY21.Chr1.598	4.07	3.25	3.08	3.01	3.54
KY21.Chr1.599	8.31	6.53	4.89	4.54	4.4
KY21.Chr1.6	2.1	1.39	0.88	0.95	1.24
KY21.Chr1.60	1.27	0.2	0.08	0.07	0.05
KY21.Chr1.600	1.73	0.9	0.67	0.84	0.83
KY21.Chr1.601	7.43	8.28	5.53	6.51	7.38
KY21.Chr1.602	0.43	0.05	0.19	0.35	0.25
KY21.Chr1.603	1.15	0.29	0.65	0.08	0.19
KY21.Chr1.604	3.06	3.15	0.41	1.43	0.86
KY21.Chr1.605	0	0	0	0.03	0
KY21.Chr1.606	40.51	25.74	24.84	29.57	21.86
KY21.Chr1.607	28.77	12.92	10.75	9.08	7.89
KY21.Chr1.608	5.35	3.54	3.01	2.97	2.14
KY21.Chr1.609	1.72	1.19	1.2	0.72	0.72
KY21.Chr1.61	12.14	8.26	6.55	6.18	5.01
KY21.Chr1.610	53.76	28.43	25.32	27.35	19.54
KY21.Chr1.611	0.06	0	0.02	0.03	0.12
KY21.Chr1.612	3.11	1.57	1.82	1.58	1.31
KY21.Chr1.613	4.75	3.63	3.41	4.46	3.52
KY21.Chr1.614	26.98	20.19	19.27	25.59	21.68
KY21.Chr1.615	0	0.06	0	0.2	0.39
KY21.Chr1.616	1.53	0.9	1.27	1.14	1.27
KY21.Chr1.617	0.26	0.04	0.03	0.02	0.05
KY21.Chr1.618	0.17	0.01	0	0.01	0
KY21.Chr1.619	139.31	87.56	89.75	83.88	63.31
KY21.Chr1.62	1.32	0.93	1.16	1.12	1.17
KY21.Chr1.620	0.59	0.31	0.16	0.07	0.09
KY21.Chr1.621	0.03	0.03	0.05	0.07	0.05
KY21.Chr1.622	6.84	4.9	5.53	7.68	6.54
KY21.Chr1.623	16.7	10.54	9.49	10.38	5.92
KY21.Chr1.624	3.4	2.51	3	2.89	1.39
KY21.Chr1.625	13	6.94	6.96	7.8	4.53
KY21.Chr1.626	5.11	4.07	3.58	3.75	3.56
KY21.Chr1.627	3.43	3.52	3.6	4.16	6.23
KY21.Chr1.628	1.28	1.15	1.53	1.3	1.98
KY21.Chr1.629	0.04	0.05	0	0	0.02
KY21.Chr1.63	173.02	122.8	117.96	156.33	105.3
KY21.Chr1.630	1.28	0.81	1.9	1.69	1.65
KY21.Chr1.631	2.95	1.82	2.57	2.59	2.33
KY21.Chr1.632	0.6	0.32	0	0.35	0.7
KY21.Chr1.633	10.07	3.8	4.05	3.22	4.67
KY21.Chr1.634	0.01	0	0	0	0
KY21.Chr1.635	0	0	0	0	0
KY21.Chr1.636	13.11	8.56	11.29	31	53.07
KY21.Chr1.637	0	0	0	0	0
KY21.Chr1.638	5.62	5.6	2.64	4.61	4.2
KY21.Chr1.639	6.12	7.34	8.08	7.18	5.75
KY21.Chr1.64	1.34	1.46	0.78	0.72	0.82
KY21.Chr1.640	0.81	0	0.28	0.57	0.11
KY21.Chr1.641	1.13	1.54	0	2.27	0.34
KY21.Chr1.642	0	0	0	0	0
KY21.Chr1.643	0.25	0.31	0.21	0.21	0.03
KY21.Chr1.644	10.34	6.38	6.77	4.04	1.57
KY21.Chr1.645	33.11	19.76	14.83	13.21	14.54
KY21.Chr1.646	0	0	0	0	0
KY21.Chr1.647	2.04	1.66	1.39	1.54	0.93
KY21.Chr1.648	0	0	0	0	0
KY21.Chr1.649	55.04	32.63	21.25	4.9	2.94
KY21.Chr1.65	5.39	3.38	3.41	2.86	1.93
KY21.Chr1.650	4.95	3.46	3.1	3	2.66
KY21.Chr1.651	0.12	0.12	0.03	0.02	0.03
KY21.Chr1.652	0	0	0	0	0
KY21.Chr1.653	0	0	0.01	0.03	0
KY21.Chr1.654	2.92	2.54	2.08	2.79	2.35
KY21.Chr1.655	2.64	2.36	2.25	2.38	2.15
KY21.Chr1.656	3.66	2.09	2.55	2.88	1.68
KY21.Chr1.657	18.08	14.31	9.94	8.43	6.66
KY21.Chr1.658	4.07	3.49	2.66	2.35	2.84
KY21.Chr1.659	6.28	4.84	3.95	4.14	4.89
KY21.Chr1.66	17.25	11.34	13.77	14.19	11.78
KY21.Chr1.660	1.5	0.76	0.91	0.84	0.85
KY21.Chr1.661	25.33	18.42	18.39	18.75	12.73
KY21.Chr1.662	9.51	7.72	5.32	6.13	5.73
KY21.Chr1.663	0.65	0	0	0.78	0
KY21.Chr1.664	9.95	6.81	4.4	3.3	5
KY21.Chr1.665	0	0	0	0	0
KY21.Chr1.666	0	0	0	0	0
KY21.Chr1.667	0	0	0	0	0.03
KY21.Chr1.668	7.2	6.1	6.43	6.65	6.76
KY21.Chr1.669	7.29	5.09	5.54	6.05	6.01
KY21.Chr1.67	0	0.05	0.09	0.08	0.04
KY21.Chr1.670	2.31	2.08	1.09	1.33	1.15
KY21.Chr1.671	0	0	0	0	0
KY21.Chr1.672	21.07	13.94	11.3	11.51	13.01
KY21.Chr1.673	4.84	2.91	2.77	3.02	3.14
KY21.Chr1.674	0.94	0.56	0.72	0.38	0.41
KY21.Chr1.675	5.43	2.98	2.66	2.76	2.3
KY21.Chr1.676	7.33	5.27	4.2	4.45	3.64
KY21.Chr1.677	3.27	2.36	1.54	1.57	1.23
KY21.Chr1.678	9.2	6.09	4.33	4.44	4.81
KY21.Chr1.679	1.85	1.45	1.53	1.04	1.19
KY21.Chr1.68	0	0	0	0	0
KY21.Chr1.680	21.5	11.84	10.28	11.03	8.94
KY21.Chr1.681	4.65	1.83	0.82	1.07	1.57
KY21.Chr1.682	0	0	0	0	0
KY21.Chr1.683	27.28	21.17	17.53	21.29	17.91
KY21.Chr1.684	3.99	2.19	1.7	1.3	1.17
KY21.Chr1.685	0.62	0.03	0.27	0.31	0.22
KY21.Chr1.686	0	0	0	0	0
KY21.Chr1.687	0.42	0.22	0.22	0.2	0.15
KY21.Chr1.688	19.76	13.09	9.08	6.74	8.53
KY21.Chr1.689	7.57	4.3	4.42	4.09	3.32
KY21.Chr1.69	0.06	0	0.13	0.01	0.02
KY21.Chr1.690	0.9	0.68	0.75	0.54	0.48
KY21.Chr1.691	1.64	1.48	1.48	1.17	0.56
KY21.Chr1.692	0.96	0.67	0.53	0.84	0.63
KY21.Chr1.693	0.04	0.04	0.03	0	0.05
KY21.Chr1.694	6.7	4.83	5.18	4.69	3.32
KY21.Chr1.695	2.97	2.7	2.54	2.35	2.3
KY21.Chr1.696	21.73	16.14	12.58	7.04	10.11
KY21.Chr1.697	15.06	8.97	8.78	9.05	6.85
KY21.Chr1.698	0	0	0	0	0
KY21.Chr1.699	27.17	18.96	17.64	17.79	19.05
KY21.Chr1.7	6.79	4.94	4.8	5.37	5.7
KY21.Chr1.70	0	0	0	0	0
KY21.Chr1.700	0.63	0.43	0.45	0.44	0.45
KY21.Chr1.701	0.84	0	0	1.64	1.49
KY21.Chr1.702	19.65	13.7	9.8	12.56	8.4
KY21.Chr1.703	4.54	2.92	2.69	2.68	3.38
KY21.Chr1.704	0	0	0	0	0
KY21.Chr1.705	18.77	12.68	12.3	16.48	9.34
KY21.Chr1.706	42.29	36.15	36.18	48.33	44.49
KY21.Chr1.707	0.96	0.93	0.6	0.67	0.61
KY21.Chr1.708	0	0	0.02	0	0
KY21.Chr1.709	0.63	0.33	0.51	0.33	0.48
KY21.Chr1.71	36.17	23.19	20.76	19.05	16.35
KY21.Chr1.710	3.58	3.06	3.03	2.48	2.21
KY21.Chr1.711	0	0	0.03	0	0
KY21.Chr1.712	0	0.43	0	0.07	0
KY21.Chr1.713	0	0	0	0	0
KY21.Chr1.714	0	0	0	0	0
KY21.Chr1.715	13.23	11.7	9.79	9.66	9.6
KY21.Chr1.716	15.06	8.98	9.94	10.35	9.51
KY21.Chr1.717	0.21	0.18	0.19	0.08	0.07
KY21.Chr1.718	0.02	0	0	0.06	0.01
KY21.Chr1.719	4.27	3.04	2.44	1.76	1.42
KY21.Chr1.72	0.16	0.09	0.15	0.09	0.02
KY21.Chr1.720	20.75	17.37	14.16	15.55	13.79
KY21.Chr1.721	0	0	0	0	0
KY21.Chr1.722	0	0	0	0	0
KY21.Chr1.723	302.39	170.87	146.82	113.33	92.57
KY21.Chr1.724	0	0	0	0	0
KY21.Chr1.725	0.08	0.02	0	0.03	0.05
KY21.Chr1.726	0	0	0	0	0
KY21.Chr1.727	2.56	2.55	1.97	1.99	1.79
KY21.Chr1.728	15.64	11.43	7.38	6.79	7.06
KY21.Chr1.729	0	0	0	0	0
KY21.Chr1.73	1.46	1.32	1.11	1.29	1.22
KY21.Chr1.730	0.08	0	0	0	0
KY21.Chr1.731	13.1	10.14	4.75	6.21	4.38
KY21.Chr1.732	0	0.04	0.1	0.24	0.29
KY21.Chr1.733	2.12	1.12	2.29	1.4	1.55
KY21.Chr1.734	0.88	1.01	0.92	0.91	1.02
KY21.Chr1.735	42.37	26.34	20.11	18.04	16.51
KY21.Chr1.736	0	0	0	0	0
KY21.Chr1.737	0	0	0	0	0
KY21.Chr1.738	7.87	5.52	4.98	5.46	3.78
KY21.Chr1.739	13.15	8.27	13.48	25.04	17.12
KY21.Chr1.74	5.21	4.71	2.93	3.01	4.39
KY21.Chr1.740	0.38	0.37	0.55	0.61	0.47
KY21.Chr1.741	0	0	0	0	0
KY21.Chr1.742	1.29	1.17	1.31	1.03	1.08
KY21.Chr1.743	46.23	31.34	22.85	24.88	14.37
KY21.Chr1.744	1.32	0.99	0.83	0.6	0.47
KY21.Chr1.745	18.06	12.55	8.88	8.64	8.05
KY21.Chr1.746	0.08	0.09	0.11	0.13	0.12
KY21.Chr1.747	15.99	11.99	12.72	13.17	8.83
KY21.Chr1.748	4.61	3.04	2.47	2.42	1.97
KY21.Chr1.749	0	0	0	0	0.28
KY21.Chr1.75	187.38	125	121.89	130.52	98.64
KY21.Chr1.750	0.29	0.3	0.24	0.3	0.22
KY21.Chr1.751	2.19	1.91	1.53	2.38	2.2
KY21.Chr1.752	6.48	5.64	4.41	4.9	4.91
KY21.Chr1.753	1.26	1.55	1.65	1.88	1.02
KY21.Chr1.754	9.32	7.26	6.32	6.71	6.87
[truncated: 16,789 more rows]
